1 **Actomyosin-II facilitates long-range retrograde transport of large cargoes by**  
2 **controlling axonal radial contractility**

3 Tong Wang<sup>1,3,\*</sup>, Wei Li<sup>1</sup>, Sally Martin<sup>1,2</sup>, Andreas Papadopoulos<sup>1</sup>, Golnoosh  
4 Shamsollahi<sup>1</sup>, Vanessa Lanoue<sup>1</sup>, Pranesh Padmanabhan<sup>1</sup>, He Huang<sup>1</sup>, Xiaojun Yu<sup>1</sup>,  
5 Victor Anggono<sup>1,3</sup> and Frederic A. Meunier<sup>1,3,\*</sup>

6 **Affiliations:**

7 <sup>1</sup>Clem Jones Centre for Ageing Dementia Research, Queensland Brain Institute, The  
8 University of Queensland, Brisbane, QLD 4072, Australia.

9 <sup>2</sup>Current address: The Australian Institute for Bioengineering and Nanotechnology, The  
10 University of Queensland, Brisbane, QLD 4072, Australia.

11 <sup>3</sup>Senior author.

12 \*Correspondence to: Tong Wang ([t.wang4@uq.edu.au](mailto:t.wang4@uq.edu.au)), or Frederic A. Meunier  
13 ([f.meunier@uq.edu.au](mailto:f.meunier@uq.edu.au)), Clem Jones Centre for Ageing Dementia Research,  
14 Queensland Brain Institute, The University of Queensland, Brisbane, Queensland 4072,  
15 Australia.

16

17 **Abstract**

18 Most mammalian neurons have a narrow axon, which constrains the passage of large  
19 cargoes such as autophagosome as they can be larger than the axon diameter. Variations  
20 in tension must therefore occur radially to facilitate changes in axonal diameter and  
21 ensure efficient axoplasmic trafficking. Here, we reveal that the transit of diverse large  
22 membrane-bound cargoes causes an acute, albeit transient, radial expansion of the  
23 axonal diameter, which is immediately restored by constricting forces. We demonstrate  
24 that non-muscle myosin II (NM-II) forms ~200 nm periodic structures, which associate  
25 with axonal F-actin rings. Inhibition of NM-II activity with blebbistatin significantly  
26 increases axon diameter without affecting the periodicity of either the F-actin rings or  
27 NM-II. This sustained radial expansion significantly affects the trafficking speed,  
28 directionality, and reduces the overall efficiency of long-range retrograde axonal  
29 cargoes, eventually leading to focal axon swelling and cargo accumulation, which are  
30 hallmarks of axonal degeneration.

31

32 **Introduction**

33 Neurons are polarized cells that contain many nerve terminal boutons separated from  
34 the cell body by a long and thin axon. Within the axon, an active bidirectional cargo  
35 transport system mediates the trafficking of proteins, lipids, membrane-bound vesicles  
36 and organelles (cargoes) that undergo retrograde or anterograde transport. Tightly  
37 regulated axonal transport is pivotal for neuronal development, communication and  
38 survival<sup>1,2</sup>. Despite the heavy trafficking, quantitative electron microscopy studies have  
39 found that thin axons (inner diameter < 1  $\mu\text{m}$ ) are the most abundant type in the  
40 mammalian central nervous system (CNS)<sup>3,4</sup>. For instance, the long-range connective  
41 axons found in the human corpus callosum have an average diameter that ranges

42 between 0.64  $\mu\text{m}$  and 0.74  $\mu\text{m}^3$ . In contrast, the size of axonal cargoes is highly variable,  
43 encompassing autophagosomes (0.5-1.5  $\mu\text{m}$ )<sup>5</sup>, mitochondria (0.75-3  $\mu\text{m}$ )<sup>6</sup> and  
44 endosomes (50 nm-1  $\mu\text{m}$ )<sup>7</sup>. Thus, the range of cargo sizes is comparable to, or  
45 surprisingly even larger than some of the CNS axons themselves. This advocates for  
46 the existence of radial contractility in the axons, which would allow the transient  
47 expansion of axon calibre and facilitate the passage of large cargoes. Indeed, the  
48 expansion of axonal diameter surrounding large cargoes, *i.e.* autophagosomes<sup>8</sup> or  
49 mitochondria<sup>9</sup>, has been observed by super-resolution microscopy and 2D-electron  
50 microscopy (EM) in both normal and degenerating axons<sup>10, 11</sup>. Considering the spatial  
51 limitation exerted by the rigid axon membrane<sup>12</sup>, the trafficking of large cargoes is  
52 likely to be affected. In fact, a simulation study based on axon structure and intra-axonal  
53 microfluidic dynamics predicted that cargo trafficking was impeded by the friction from  
54 the axonal walls in small-calibre axons<sup>13</sup>. In line with this prediction, a correlation  
55 between axon diameter and axon trafficking was recently reported in *Drosophila*<sup>14, 15</sup>  
56 and rodent neurons<sup>16, 17</sup>. However, direct evidence showing whether and how axonal  
57 radial contractility affects cargo trafficking is still lacking.

58

59 We hypothesized that the underlying structural basis for axonal radial contractility is  
60 the subcortical actomyosin network, which is organized into specialized structures  
61 called membrane-associated periodic cytoskeletal structures (MPS), as revealed with  
62 super-resolution microscopy along the shafts of mature axons<sup>18</sup>. F-actin, together with  
63 adducin and spectrin, forms a subcortical lattice with a ~190 nm periodic interval  
64 covering the majority of the axon length<sup>18, 19</sup>. The disrupting of axonal F-actin leads to  
65 loss of MPS<sup>20, 21</sup>, whereas the depletion of adducin causes progressive dilation of the  
66 axon diameter and axon loss, with slightly impaired axonal trafficking<sup>16</sup>. The fact that

67 adducin knock-out axons are still capable of decreasing the diameter of actin rings over  
68 time suggests the existence of additional actin regulatory machineries that maintain this  
69 constriction. Indeed, the dynamic contractility of the subcortical actomyosin network  
70 depends on non-muscle myosin-II (NM-II)<sup>22</sup>, which generates the subcellular forces  
71 required to restore the shape of the cell following acute stretching<sup>23</sup>. In line with this  
72 function, the activated regulatory light chain (pMLC) of NM-II has recently been shown  
73 to exist in periodic patterns in close association with the MPS in the axon initiation  
74 segment (AIS) of mammalian CNS neurons<sup>24</sup>, with actomyosin-dependent contractility  
75 being implicated in maintaining axon diameter by coupling the radial and axial axonal  
76 contractility in *Drosophila*<sup>14</sup>. Understanding how the dynamic cytoskeletal architecture  
77 coordinates the radial axonal contractility and cargo trafficking is therefore warranted.

78

79 In this study, we used super-resolution live-imaging approaches to examine the  
80 correlation between the speed of axonal cargoes undergoing long-range transport and  
81 their size. We found that the speed inversely correlates with the cargo size, and that the  
82 axon undergoes dynamic local deformation during the passage of large cargoes, which  
83 induces transient enlargement immediately followed by constriction of the axon  
84 diameter. We further demonstrated, using super-resolution structured illumination  
85 microscopy (SR-SIM) as well as simulated emission depletion (STED) microscopy,  
86 that this transient change in axon diameter is mediated by NM-II, which forms an  
87 approximately 200 nm periodical structure perpendicular to the longitudinal axis of  
88 axons. Our results suggest that CNS axons are under constitutive radial constriction,  
89 which limits their diameter. Accordingly, short-term inhibition of axonal NM-II activity  
90 with blebbistatin, a specific membrane-permeable inhibitor that stabilizes myosin-II in  
91 an actin-detached state<sup>25</sup>, does not affect the periodicity of either F-actin or NM-II itself,



92 but rather effectively decreases their colocalization and expands the diameter of the  
93 axon. As a result of augmented axon diameter, short-term blebbistatin incubation  
94 affects the transport speed of large cargoes by increasing both the speed of fast-moving  
95 cargoes and the back-and-forth movements of stalled ones. This leads to an increase in  
96 cargo mobility at the expense of overall trafficking efficacy. Prolonged NM-II  
97 inactivation by either blebbistatin treatment or transfection of a myosin-II regulatory  
98 light chain (MRLC) loss-of-function mutant eventually leads to the formation of focal  
99 axon swellings (FAS) and the accumulation of retrograde cargoes along the axons. In  
100 conclusion, our study reveals the critical role of axonal NM-II which, by associating  
101 with subcortical MPS in the axon shaft, provides subcellular radial constriction that  
102 minimizes the axonal swelling and undirected cargo movements. It therefore ensures  
103 the structural stability as well as the cargo-trafficking efficiency along the small-calibre  
104 axons.

105

## 106 **Results**

107 *The speed of retrograde axonal cargoes is inversely correlated with their size.*

108 Large axonal cargoes such as endosomes, lysosomes, autophagosomes and  
109 mitochondria tend to accumulate in FAS under pathological conditions<sup>26</sup>, suggesting  
110 that the size of cargoes might alter the axonal trafficking efficacy. To determine the  
111 relationship between the size of cargoes and their transport speed, we analyzed the  
112 speeds of various-sized retrograde lysosomal and endosomal vesicles. These cargoes  
113 were generated and fluorescent-labelled with the lysosomal marker LysoTracker or the  
114 endosomal marker Cholera toxin subunit B (CTB) at the nerve terminals, and  
115 underwent retrograde trafficking along the axon bundles of live hippocampal neurons  
116 cultured in microfluidic devices (Fig. 1a, b). Hydrostatic pressure was used to restrict

117 the labelling reagents to the terminal chamber during the 5 min pulse-labelling (Fig.  
118 1c). This was followed by a thorough wash in culture medium to remove the excess  
119 fluorescent probe and confocal time-lapse imaging and automatic tracing of the  
120 fluorescently tagged cargoes as previously described<sup>8, 27, 28</sup>. To investigate different  
121 stages of axonal trafficking, live-imaging was performed in two distinct axonal regions:  
122 (1) the axon shafts adjacent to the soma chamber (Fig. 1d, left) and (2) within the  
123 terminal chamber (Fig. 1d, right). Lysotracker-labelled vesicles detected in the nerve  
124 terminal chamber exhibited very confined movements (sFig. 1a and sMov. 1). We  
125 further quantified the average speed of these tracks, which were sorted into two  
126 different groups according to their diameter (sFig. 1a, bottom panels). We observed that  
127 vesicles with a large diameter ('large', diameter > 0.5  $\mu\text{m}$ ) moved significantly slower  
128 ( $0.115 \pm 0.039 \mu\text{m/s}$ ) than those with a smaller diameter ('small', diameter  $\leq 0.5 \mu\text{m}$ ;  
129  $0.159 \pm 0.006 \mu\text{m/s}$ ), as shown in sFig. 1b. This suggests that transport of large axonal  
130 cargoes in axons surrounding nerve terminals could be impeded during their transit. To  
131 specifically investigate the correlation between the size of axonal cargoes and their  
132 active transport speed, we further examined the trafficking speed of long-range CTB-  
133 positive retrograde carriers in the soma-proximal axon channels (Fig. 1e-g). Consistent  
134 with our previous study<sup>29</sup>, these long-range carriers exhibited a much faster trafficking  
135 speed ( $0.974\text{-}1.659 \mu\text{m/s}$ ) than the carriers at nerve terminals ( $0.115\text{-}0.159 \mu\text{m/s}$ ; Fig.  
136 1g; sFig. 1b). Similar to the lysosomes in the nerve terminals, the trafficking speed of  
137 these CTB-positive carriers also inversely correlated with their diameter, with small-  
138 diameter cargoes moving faster ( $1.657 \pm 0.06 \mu\text{m/s}$ ) than large-diameter ones ( $0.974 \pm$   
139  $0.05 \mu\text{m/s}$ ; Fig. 1g; sMov. 2). We then examined the correlation between cargo size and  
140 speed by plotting the apparent diameter of either lysosomal carriers or CTB-positive  
141 carriers against their speed. This revealed a negative correlation, with a Pearson's

142 coefficient of  $-0.303 \pm 0.095$  and  $-0.273 \pm 0.036$  between cargo diameter and trafficking  
143 speed in the terminal (“Lysotracker”, Fig. 1h) and proximal (“CTB”, Fig. 1h) axons,  
144 respectively, indicating that the speed of the trafficked cargoes declines as the cargo  
145 size increases.

146

147 ***Transit of large cargoes causes a significant radial expansion of the axon.***

148 Each organelle undergoing retrograde axonal transport is driven by multiple dyneins,  
149 which are stochastically activated and collectively drive cargo transport through the  
150 axonal cytosol<sup>30-32</sup>. Given the low viscosity of axonal cytosol, the force generated by  
151 cooperative dyneins is sufficient to ensure their retrograde trafficking through the  
152 axon<sup>32</sup>. Thus, the reduced speed of the larger cargoes we observed is unlikely due to  
153 insufficient driving force or a higher viscous load due to the larger size. Considering  
154 the recent evidence suggesting the role of axon diameter in axon cargo trafficking<sup>14-16</sup>,  
155 we hypothesized that the size-dependent friction on the axonal cargoes comes from the  
156 constrictive force exerted by the axonal plasma membrane, which is more likely to  
157 impede the transport of larger retrograde cargoes.

158 To test this hypothesis, we examined the diameter of axons in the presence or absence  
159 of cargoes at the ultrastructural level. In order to eliminate confounding factors related  
160 to the analysis of dendrites, experiments were only performed on axonal bundles  
161 formed within the channels of microfluidic devices<sup>8, 27, 28</sup>, as shown in Fig. 2a. We first  
162 used EM to visualize the morphology of both axon shafts and their internal cargoes. As  
163 demonstrated in Fig. 2b-c, on the parallel axonal bundles, the diameters of axons were  
164 indeed significantly increased around large cargoes, such as large endosomes (Fig. 2c,  
165 i, arrow), mitochondria (Fig. 2c, ii and iii, white arrowheads) and autophagosomes (Fig.  
166 2c, iii and iv, black arrowheads). When we measured the diameter of the axonal

167 segment with (red) and without cargo (blue) in the same axon, we found that those with  
168 cargoes had a significantly larger diameter ( $347 \pm 15.6$  nm) than those without cargoes  
169 ( $259 \pm 9.4$  nm; Fig. 2d) with paired comparison. We also observed that, as the size of  
170 the cargoes increased, the extent of axon expansion also increased proportionally (Fig.  
171 2e, f), suggesting that the stretch of the axon membrane is indeed caused by the  
172 transiting cargo.

173

174 We next investigated the effect of transiting cargoes on the diameter of axons in live  
175 hippocampal neurons. To effectively label the subcortical actomyosin network in axons,  
176 we used Lifeact-GFP, a peptide that binds to both actin filaments (F-actin) and cytosolic  
177 actin monomers<sup>33</sup>. Similar to a previous study<sup>34</sup>, with the resolution of SIM, we detected  
178 Lifeact-GFP distribution in both the filamentous and cytosolic fractions in axons of live  
179 hippocampal neurons (Fig. 3a), with the plasma membrane labelled by CTB-Alexa555.  
180 Interestingly, the improved 3D-SIM resolution allowed us to observe various-sized  
181 intra-axonal fluorescence voids (“black-holes”) that likely represent axoplasmic  
182 organelles (Fig. 3b), which are known to exclude actin from their lumens<sup>35</sup>. Similar to  
183 the cargo-induced axon dilation observed with EM, the axon diameter was also  
184 significantly expanded in axon segments with black-holes (Fig. 3c). We then  
185 characterized the nature of these black-holes by comparing their localization with that  
186 of various organelle markers resolved by 3D-SIM, and found substantial overlap with  
187 autophagosomes (LC3-mRFP, Fig. 3d), late endosomes (Rab7-mRFP, Fig. 3e) and  
188 mitochondria (Mito-TagRFP, Fig. 3f). This suggests that these black-holes were indeed  
189 created by large organelles, which caused significant local dilation of the axon (Fig.  
190 3g). To further investigate whether these black-holes were cargoes that associate with  
191 the transport machinery, we determined their colocalization with markers of retrograde

192 carriers, such as terminal-derived CTB<sup>27</sup> and the neuron-specific dynein intermediate  
193 chain 1B (DIC<sup>1B</sup>)<sup>36</sup>. The black-holes partially overlapped with CTB- and DIC<sup>1B</sup>-  
194 positive axonal structures (Fig. 3h, i), indicating that a substantial portion of them were  
195 indeed caused by retrograde trafficking organelles in live axons.

196

197 Next, we investigated whether the transit of cargoes correlated with the local axon  
198 dilation in live axons. Using time-lapse SIM and unbiased Gaussian fitting (Fig. 4a),  
199 we assessed the fluctuations in axon diameter and clearly detected radial diameter  
200 expansion through the transient separation of the two lateral axonal membranes, which  
201 caused an increase in the distance between the centre of the Gaussians (Fig. 4b; sMov.  
202 3). This effect was transient and the initial diameter was restored after the passage of  
203 the organelles (black-holes), as shown in Fig. 4c. In addition, the association between  
204 diameter expansion and the passage of lysotracker- and CTB-positive carriers was also  
205 observed by phase-contrast confocal microscopy (Fig. 4d-e). Taken together, our  
206 results demonstrate that radial dilation of the axon diameter is caused by the passage of  
207 cargoes in the axons of live hippocampal neurons.

208

209 ***NM-II forms periodic structures that associate with F-actin MPS and controls the***  
210 ***radial contractility of axon.***

211 The contractility and plasma membrane tension of cells is controlled by NM-II. To  
212 investigate whether NM-II is involved in the cargo-associated radial dilation of axons,  
213 we treated Lifeact-GFP-expressing neurons with blebbistatin, and examined the cargo-  
214 associated diameter fluctuations of their axons. We observed that blebbistatin treatment  
215 (10  $\mu$ M, 60 min) caused a significant relaxation of the axon shaft by increasing axon  
216 diameter with ( $\phi_{+cargo}$ ) and without ( $\phi_{-cargo}$ ) cargoes (Fig. 5a, b). We then explored the

217 diameter fluctuations by comparing the average ratio of axon diameter containing  
218 cargoes to that without cargoes, and used this ratio ( $\phi_{+cargo}/\phi_{-cargo}$ ) as an index of the  
219 cargo-associated diameter fluctuations. Blebbistatin treatment significantly decreased  
220 this index, resulting in more uniformly dilated axons (Fig. 5c). These results suggest  
221 that radial contractility of the axon shaft is dependent on the NM-II activity of the  
222 actomyosin network.

223

224 To further explore the molecular basis of the axonal radial contractility, we sought to  
225 resolve the actomyosin structure along the axon shafts. As F-actin and its associated  
226 proteins are known to form MPS in axons<sup>18, 19, 21</sup>, we first aimed to characterize the  
227 actin MPS along the axon shaft using SIM, which had previously been used to  
228 accurately visualize axon MPS<sup>37</sup>. In cultured hippocampal neurons, phalloidin staining  
229 of F-actin allowed the observation of MPS formed along the axon shaft with a  
230 conserved longitudinal spacing of ~190 nm (Fig. 5d; sFig. 2a), as quantified using the  
231 frequency distribution of spacing between adjacent actin peaks detected using  
232 phalloidin-647 ( $191.8 \pm 2.3$  nm; Fig. 5e-f; sFig. 2b) or Lifeact-GFP (sFig. 2c-g), and  
233 confirmed by auto-correlation analysis ( $184.6 \pm 4.1$  nm; Fig. 5g). Obtained values were  
234 similar to those previously reported in rat hippocampal axons<sup>18,21</sup>. As NM-II is involved  
235 in the regulation of axonal diameter<sup>14</sup> and associated with the MPS in axons<sup>24</sup>, we also  
236 examined whether blocking NM-II activity affected the spacing of actin MPS. 60 min  
237 of blebbistatin treatment had no effect on this spacing (Fig. 5e, f). However, this short-  
238 term treatment significantly increased the radial diameters of the actin rings in treated  
239 axons (Fig. 5d, h), causing a more uniformly dilated actin MPS, as reflected by the  
240 decreased ring diameter fluctuation (Fig. 5i). These results are consistent with the effect  
241 of blebbistatin on axonal diameter expansion in live axons. The significant dilation of

242 actin MPS caused by detaching NM-II suggests that the interaction between NM-II and  
243 actin MPS underlies the radial contractility of axons.

244

245 To examine this hypothesis and assess the relationship between the distribution of  
246 endogenous NM-II and actin MPS along the axon shaft, we used dual-colour 3D-SIM .  
247 We co-labeled the axons of DIV14 rat hippocampal neuron with phalloidin and an  
248 antibody that recognizes the C-terminus central domain of NM-IIB ( $\alpha$ NM-II(ct)), the  
249 dominant form of NM-II in axons<sup>24</sup>, and we observed that NM-II exhibited a periodic  
250 distribution (Fig. 6a, b), with an average spacing of  $197.5 \pm 3.1$  nm (Fig. 6c, d), which  
251 is similar to the periodicity determined by the autocorrelation method ( $187.4 \pm 9.8$  nm,  
252 Fig. 6e). To further examine the orientation and periodicity of the NM-II filaments  
253 along the axon, we used another NM-IIB antibody that recognizes its N-terminal head  
254 domain ( $\alpha$ NM-II(nt)) and which was previously used to detect a bipolar structure of  
255 NM-II filaments with super-resolution microscopy<sup>38, 39</sup>. Using super-resolution  
256 stimulated emission depletion (STED) microscopy (sFig. 3a), we found that the  $\alpha$ NM-  
257 IIB(nt) stained for a bipolar structure that had a periodic spacing of  $206.4 \pm 2.6$  nm  
258 along the axons (sFig. 3c). These values were consistent with that of phosphorylated-  
259 MLC spacing, as reported recently<sup>24</sup>. Interestingly, these bipolar NM-II structures  
260 presented a perpendicular orientation to the axon axis in both mono-colored  $\alpha$ NM-  
261 IIB(nt) stained axons detected by 3D-STED (sFig. 3b) and the dual-colored  $\alpha$ NM-  
262 IIB(nt) and  $\alpha$ NM-IIB(ct) co-stained axons detected by 3D-SIM (sFig. 3d, e).

263

264 We also examined the correlation between the actin and NM-II MPS distribution, and  
265 noted that they exhibited both overlapping (arrows, Fig. 6b; sFig. 4a, b) and alternating  
266 (arrowheads, Fig. 6b; sFig. 4a, b) distribution patterns, which were reflected by the high

267 cross-correlation coefficient of  $0.684 \pm 0.091$  (Fig. 6f, at 0 nm shift). However, we  
268 failed to detect an obvious cross-periodicity between actin and NM-II (Fig. 6f), which  
269 was probably due to the fact that the periodicity between these two patterns is beyond  
270 the resolution limit of SIM (~100 nm). We next investigated whether the localization  
271 pattern of NM-II was affected by the inhibition of its activity, and found that short-term  
272 blebbistatin treatment did not significantly change the NM-II spacing (Fig. 6c-e), but  
273 significantly decreased the degree of cross-correlation between NM-II and actin MPS  
274 ( $0.414 \pm 0.073$  (0 nm); Fig. 6f). Indeed, it was apparent that NM-II and actin MPS  
275 distributed more discretely from each other in the axons of blebbistatin-treated neurons  
276 (Fig. 6a, b, bottom panels). This reduction in NM-II and actin correlation was further  
277 supported by the reduced colocalization between NM-II and actin voxels following  
278 blebbistatin treatment, as resolved from the 3D-SIM images (sFig. 4b-d).

279

280 To confirm that the NM-II indeed correlated with actin MPS in the subcortical network,  
281 which is associated with the axonal plasma membrane, we adopted the method of Triton  
282 X-100 extraction before fixation to specifically remove the subcortical actin MPS  
283 components as previously reported<sup>20</sup>. Following this extraction, we observed a  
284 significant reduction in actin MPS (sFig. 4e, f), confirming the disruption of the  
285 membrane-associated actin MPS. Together with this reduction, we detected a dramatic  
286 reduction in NM-II positive puncta (sFig. 4e, g). This concomitant decrease in both  
287 actin MPS and NM-II (sFig. 4h) further supports the notion that NM-II correlates with  
288 actin MPS in the membrane-associated subcortical network. Together, these results  
289 indicate that NM-II controls the contraction of the subcortical actin MPS, which  
290 underlies the radial contractility of axons.

291



292 *Short-term inhibition of NM-II activity causes sustained axon dilation and interferes*  
293 *with the long-range retrograde trafficking of large cargoes.*

294 To test whether axon radial contractility has a functional role in cargo transport, we  
295 examined the effect of blebbistatin on retrograde axonal trafficking in neurons grown  
296 in a 6-well microfluidic device (sFig. 5a), where we could restrict the action of  
297 blebbistatin to the axon segments by adding it through the middle chamber (sFig. 5b).  
298 Widespread dilation of the axons diameter along their longitudinal direction was  
299 observed following 90 min of blebbistatin incubation (sFig. 5c-e). To test the integrity  
300 of these treated axons, we further examined the axonal microtubule structure by dual-  
301 color SIM using a  $\beta$ -tubulin III antibody and phalloidin (sFig. 5f). We found that neither  
302 the microtubule bundle intensity (sFig. 5g) nor width (sFig. 5h) were affected by 60  
303 min blebbistatin treatment. This blebbistatin treatment also failed to affect the  
304 mitochondrial anchoring, as the movement of the immobile mitochondrial fraction was  
305 not affected (sFig. 5i, j), whereas the mobile fractions with the higher average speeds  
306 were significantly increased by the blebbistatin movement (sFig. 5i, j), suggesting that  
307 the NM-II-dependent axonal contractility is likely to affect the cargo transport.

308

309 To further assess the effects of axonal contractility on cargo trafficking, we examined  
310 the impact of disrupting NM-II activity on retrograde trafficking in short-term  
311 blebbistatin-treated axons. The average speed of CTB-positive carriers before (pre) and  
312 after (+BLB) blebbistatin treatment for 60 min (Fig. 7a) were compared. As  
313 demonstrated earlier (Fig. 1g), small carriers moved faster than large ones in the  
314 absence of blebbistatin (Fig. 7b), whereas blebbistatin treatment specifically increased  
315 the trafficking speed of large CTB-positive carriers, but not that of small ones (Fig. 7b  
316 and sMov. 4). Similarly, an increase of the average speed was observed for large

317 Lysotracker-positive carriers, but not for small ones (Fig. 7c, sMov. 5). These results  
318 indicate that the short-term relaxation of the axonal actomyosin-II network has an initial  
319 positive impact on the trafficking of large cargoes, suggesting that axon radial  
320 contractility exerts a local brake on their transport.

321

322 Given that the large CTB-positive carrier population showed the most significant  
323 increase in speed upon blebbistatin treatment (Fig. 7b), we chose this type of carriers  
324 for more detailed motion analyses, in order to further dissect the impact of radial  
325 contractility on axonal transport. By tracking the transport of individual CTB-carriers  
326 within the microfluidic channels (Fig. 7a), we noted that their trajectories were  
327 predominately composed of two mobility states: (i) a fast-moving state and (ii) a stalled  
328 state, as indicated by the sloped and the vertical lines, respectively, in the displacement-  
329 time plot (Fig. 7d). Following 60 min blebbistatin treatment, the speed of the fast-  
330 moving state was significantly increased, as indicated by the flatter slopes (Fig. 7d),  
331 whereas in the stalled state we observed pronounced back-and-forth motion (Fig. 7d,  
332 asterisks and sMov. 4), which has been previously described as low-efficiency  
333 trafficking pattern for long-range cargo transport<sup>40</sup>. We noticed an increase in the ratio  
334 of the fast-moving CTB-carriers (sFig. 5k) and a decrease in that of the slow-moving  
335 ones (sFig. 5k). To further quantify these back-and-forth movements, we compared the  
336 ratio of direction swap ( $Sr$ ) in these tracks by measuring the ratio of the time cargoes  
337 spent travelling in the reverse direction ( $t_{rev}$ ) in relation to the total time travelled ( $t_{total}$ ),  
338 as shown in equate (1), with  $k$  being the number of trajectories.

339 
$$Sr = \frac{\sum_{k=0}^n t_{rev}^k}{\sum_{k=0}^n t_{total}^k} \quad (1)$$

340 This analysis revealed that blebbistatin treatment significantly increased the amount of  
341 time cargoes underwent reverse motion, thereby increasing the ratio of direction swap  
342 in cargoes moving along the axon (Fig. 7e). Accordingly, we found that blebbistatin  
343 treatment decreased the number of CTB-positive carriers that traversed the imaging  
344 window within a given time (Fig. 7f), suggesting that the overall retrograde trafficking  
345 efficiency was reduced. These results support the positive role of axonal radial  
346 contractility in maintaining near-unidirectional retrograde trafficking, thereby ensuring  
347 the overall efficiency of long-range retrograde transport.

348

349 We next investigated how the radial contractility impacted the mobility of the fast-  
350 moving and stalled carriers, respectively, by analyzing the dynamics of the CTB-  
351 positive carrier movements. To objectively and quantitatively analyze the effect of the  
352 contractility on the two motion states, we employed a two-state hidden Markov model  
353 (HMM) to annotate these CTB trajectories into stalled (D) and transport (DV) states  
354 (Fig. 7g), as previously described<sup>28</sup>. The separating efficacy of this model was  
355 demonstrated by the fact that the step size of the stalled ( $0.1168 \pm 0.45 \mu\text{m}$ ) and  
356 transport states ( $0.4352 \pm 1.53 \mu\text{m}$ ) were distinct from each other. We then examined  
357 the effect of blebbistatin treatment, and found that it significantly increased the step  
358 size of large CTB-positive carriers in the DV state (Fig. 7h, pink spots), which is in  
359 good agreement with our earlier observations (Fig. 7b and sMov. 4). For the D state in  
360 pretreated axons, CTB-positive carriers exhibited a much smaller step size (Fig. 7h),  
361 meaning that the mobility of these stalled carriers was constrained. However, this  
362 limited step size was significantly increased following 60 min blebbistatin treatment  
363 (Fig. 7h, blue spots). Consistent with the increased back-and-forth movements (Fig. 7d,  
364 e), this result suggests that the mobility of the stalled carriers is increased following

365 disruption of NM-II activity. Taken together, our findings indicate that the axonal  
366 actomyosin network maintains radial constriction, which not only impedes the speed of  
367 the fast-moving state but also suppresses the low-efficiency back-and-forth movement  
368 during the stall state of these long-range carriers. The overall impact of this contractility  
369 on long-range trafficking is therefore positive, which facilitates the uni-directionality  
370 and the overall efficiency of long-range retrograde carriers.

371

372 ***Prolonged inactivation of actomyosin-II causes focal axon swelling accompanied***  
373 ***with stalled cargo accumulation.***

374 In addition to 60 min blebbistatin treatment, we also examined the impact of longer  
375 exposure to blebbistatin on both axon structure and trafficking. We discovered that  
376 prolonged blebbistatin treatment (60 - 120 min) increased the percentage of axons with  
377 focal swellings (Fig. 8a, b), which was represented by the gradual formation of FAS  
378 (Fig. 8a), with these FAS becoming prevalent ( $59.85 \pm 5.159$  %) following long-term  
379 blebbistatin treatment (10  $\mu$ M, 120 min, Fig. 8b). As FAS is a hallmark of irreversible  
380 axonal damage<sup>11</sup>, these results suggested that disrupting radial contractility could  
381 directly lead to FAS and ensuing axonal degeneration.

382

383 To fully assess the effects of radial axon contractility on retrograde cargo trafficking,  
384 we further resolved the impact of long-term NM-II inhibition on the long-range  
385 trafficking of retrograde endosomal CTB-positive carriers (Fig. 8c). We found that both  
386 the trafficking speed (Fig. 8d) and transverse frequency (Fig. 8e) of these carriers were  
387 significantly reduced after 120 min blebbistatin treatment. To assess whether the axonal  
388 radial contractility affects trafficking efficiency of other retrograde cargoes, we also  
389 compared the trafficking efficacy of autophagosome (LC3-mRFP labelled), which

390 undergoes long-range retrograde trafficking<sup>8,41</sup>, in axons in the presence or absence of  
391 blebbistatin (120 min treatment). We found that similar to CTB-positive carriers, the  
392 trafficking speed of these LC3-mRFP-positive carriers was also significantly reduced  
393 (Fig. 8f, g). Importantly, we also observed the gradual accumulation of the stalled LC3-  
394 carriers at FAS (Fig. 8f, h). In addition to pharmacological inactivation of NM-II, we  
395 also transfected the myosin-II regulatory light chain with the S19AT18A mutations,  
396 (MRLC<sup>mut</sup>-GFP), which abolishes the ability of NM-II to bind to and slide along the F-  
397 actin<sup>42</sup>. We found that 48 hours after MRLC<sup>mut</sup>-GFP transfection, the structural integrity  
398 of transfected axons was significantly disrupted as reflected by the significantly  
399 increased diameter fluctuations (Fig. 8i, j) and FAS formation (Fig. 8k) compared to  
400 those transfected with wild-type controls (MRLC<sup>wt</sup>-GFP). These results suggest that the  
401 long-term inactivation of actomyosin-II not only impairs axonal trafficking but also  
402 causes irreversible structural damage to the axon, which may eventually lead to its  
403 degeneration.

404

## 405 **Discussion**

406 Many factors affect long-range axonal cargo trafficking, including the number and type  
407 of attached molecular motors<sup>43,44</sup>, the polarity of the microtubule tracks<sup>45</sup>, and friction  
408 from other organelles<sup>46</sup>. With the development of live-imaging microscopy, most of  
409 these factors have been extensively studied in cell-free *in vitro* systems<sup>44</sup>, and within  
410 the axons of cultured neurons<sup>32,47</sup> and live animals<sup>48</sup>. However, the impact of the narrow  
411 and rigid axonal plasma membrane on the transiting cargoes remains largely elusive. In  
412 this study, we have demonstrated that the transport of large membrane-bound cargoes  
413 causes an acute, albeit transient, radial stretching of the axonal plasma membrane,  
414 which is immediately restored by constitutive constricting forces generated by the  
415 membrane-associated periodic actomyosin-II network. We have also identified NM-II  
416 as a critical regulator of this radial contractility, which controls not only the speed but  
417 also the directionality of long-range cargo trafficking along the axon. Inactivation of  
418 this contractility machinery eventually leads to stalled cargo trafficking and FAS, which  
419 are early signs of axon degeneration. Our study therefore reveals novel functions of the  
420 actomyosin-II network in facilitating the efficacy of long-range axonal trafficking and  
421 maintaining the structural stability of CNS axons.

422

423 ***Radial contractility facilitates the overall efficiency of long-range retrograde axonal***  
424 ***trafficking.***

425 An efficient long-range retrograde cargo transport machinery is critical for the survival  
426 and function of neurons<sup>1,2,48</sup>. Retrograde trafficking is thrust by cytoplasmic dynein<sup>49</sup>,  
427 which drives the near-unidirectional retrograde transport of nerve terminal-derived  
428 signalling endosomes and autophagosomes to the cell body<sup>8,32</sup>. Detailed analysis of the

429 movement of these carriers has revealed that they are mainly composed of fast-moving  
430 retrograde-directed and stalled carriers, with less than 3% being reverse-directed  
431 (anterograde) carriers<sup>8, 27</sup>. A similar near uni-directional motion pattern is shared by  
432 retrograde endosomes carrying nerve growth factor (NGF)<sup>32</sup> and tetanus toxins<sup>50</sup>. The  
433 retrograde directionality of the fast-moving cargoes is driven by the progressive minus-  
434 end-directed dynein steps, the directionality of which is dependent on the opposing  
435 forces they received<sup>49</sup>. Actomyosin controls radial contractility, which poses a steric  
436 hindrance to the passing cargoes<sup>46</sup> and therefore could potentially affect the  
437 opposing force to their driven dyneins. However, the effect of the axonal actomyosin  
438 network on the dynein-driven trafficking is poorly understood. Early studies provided  
439 evidence that disrupting F-actin in axons does not interfere with organelle transport,  
440 which continues unabated or at an even faster rate<sup>51</sup>, suggesting that the axonal F-actin  
441 network acts as a physical impediment to cargo transport. In line with this, we found  
442 that short-term blebbistatin treatment released subcellular tension, causing an  
443 expansion of the axon diameter and specifically increasing the transport speed of large  
444 cargoes. Our results therefore confirm that the fast-moving state of large cargoes is  
445 subjected to a constant impediment from radial axonal constriction. On the other hand,  
446 the stalling of retrograde carriers is likely to be caused by either a balanced tug-of-war  
447 between kinesin and dynein<sup>52</sup>, or the transient detachment of dynein-driven carriers  
448 from the microtubule tracks<sup>40, 49</sup>. Our data using HMM-Bayesian partition show an  
449 increased mobility of stalled carriers after blebbistatin treatment, which suggests that  
450 axonal radial constriction might affect the microtubule attachment/tethering of these  
451 stalled carriers within the axon. This could be due to the tension-dependent tethering of  
452 dynein to the microtubule tracks<sup>53</sup>. However, further study on the coordination between  
453 cargo trafficking and local axon radial tension, using higher temporal resolution live-

454 imaging techniques, is needed to establish the precise relationship between axonal  
455 radial constriction and the motion of various-sized retrograde carriers.

456

457 ***The actomyosin-II network is the structural basis for the contractility of axon shafts.***

458 The diameter of the long and thin axon has long been believed to be uniform for the

459 same type of neurons. However, with the development of 3D EM reconstruction,

460 diameter fluctuations have been detected along the length of axons in optical nerves<sup>10</sup>.

461 Similarly, in live rat brains, axonal diameter fluctuations were revealed with super-

462 resolution microscopy after the conduction of action potentials<sup>54</sup>. Consistent with these

463 *in vivo* studies, we have used EM, SR-SIM and bright-field confocal microscopy to

464 reveal that axons undergo dynamic diameter fluctuations. With time-lapse SR-SIM and

465 confocal microscopy, we further correlated the dynamic radial expansion of the axonal

466 diameter with the passage of large cargoes. These deformations are highly correlated

467 with the transit of various types of large cargoes and are therefore most likely caused

468 by this. These transient deformations also suggest the existence of a mechanical tension

469 derived from the axonal plasma membrane. Atomic force microscopy studies have

470 identified the axon as the most rigid neuronal segment, which is under constitutive

471 tension<sup>12</sup> from the ordered periodic longitudinal MPS composed of actin, spectrin,

472 adducin and associated proteins<sup>18</sup>. Disruption of actin and spectrin abolished the actin

473 MPS, whereas adducin depletion did not affect its spacing but still caused dilation and

474 degeneration of axons<sup>16</sup>. However, the radial contractility of adducin knockout axons

475 remained unaltered, suggesting the existence of an alternative mechanism for the

476 contractility along the axon shafts.

477



478 In mammalian cells, radial contractility of subcortical actin<sup>55</sup> or actin rings<sup>35</sup> is  
479 regulated by mechanosensory NM-II, which is the major cytoskeletal complex in  
480 neurons with the ability to convert ATP into mechanical force. Recently, the activated  
481 form of NM-II light chain (pMLC) was shown to distribute in a similar periodicity and  
482 largely overlap with the actin MPS at the AIS<sup>24</sup>. Moreover, depolarization rapidly  
483 decreased NM-II activity, further suggesting that this constricting structure is highly  
484 dynamic<sup>24, 56</sup>. Consistent with these previous studies, we reveal a periodic pattern of  
485 NM-II of ~200 nm by dual labelling with phalloidin-647 and an NM-IIB C-terminus  
486 antibody. In addition, cross-correlation analysis of these two MPS demonstrates a  
487 substantial colocalization, which is significantly reduced by blebbistatin-induced NM-  
488 II detachment. Further, our results demonstrate that NM-II periodicity goes far beyond  
489 the AIS, and confirm the existence of periodic actomyosin rings, which provide the  
490 structural basis for axonal radial contractility. Higher resolution three-colour  
491 microscopic techniques are needed to further resolve the precise conformational  
492 changes that occur at the level of the actomyosin-II MPS as large cargoes pass through.  
493  
494 Over-expansion of axonal segments, such as FAS, has been noted in several  
495 neurodegenerative diseases, with the accumulation of organelles and cargoes at the  
496 axonal swellings - the presence of FAS is generally regarded as an early sign of axonal  
497 degeneration<sup>11</sup>. Similar to FAS, diameter dilation, cargo accumulation and degeneration  
498 were also observed in axons of adducin knock out mice<sup>16</sup>, as well as in axons following  
499 prolonged blebbistatin treatment (>120 min) or transfection with the inactive MRLC  
500 mutant in this study, suggesting that the actomyosin-II-dependent radial contractility is  
501 critical to maintain the structural stability of the axon. Additional studies will be

502 required to directly characterize the contractility changes in FAS and to examine  
503 whether enhancing radial contractility could have any rescuing effect.

504

505 In summary, we have uncovered an inverse correlation between axonal cargo size and  
506 trafficking speed, and demonstrated that axons undergo transient deformation caused  
507 by the cargo transition in hippocampal axon bundles. We have further identified the  
508 periodic structure of actomyosin-II along the axon shaft as the structural basis of axonal  
509 radial contractility. We have also characterized its role in facilitating long-range cargo  
510 trafficking by restricting inefficient back-and-forth cargo movement during the stall  
511 state. Our data identify a novel role for the axonal actomyosin-II network in long-range  
512 cargo trafficking, and highlight the importance of axonal membrane tension in ensuring  
513 the efficiency of this trafficking.

514

515 **Online Methods**

516 *Antibodies, molecular reagents and DNA constructs*

517 Alexa-555- and Alexa-647-conjugated recombinant CTB were obtained from  
518 ThermoFisher Scientific (#c-34776, #c-34777). Mouse anti-synaptobrevin-2 (VAMP2)  
519 antibody was obtained from Synaptic Systems (#104 211) and the rabbit anti-NM-  
520 IIB(ct) polyclonal antibodies were from Sigma-Aldrich (#M7939), mouse anti-NM-  
521 IIB(nt) monoclonal from Santa Cruz (sc-376954). Alexa-647-phalloidin was purchased  
522 from Invitrogen (#A22287), while the mouse anti-  $\beta$ -tubulin III was from Covance  
523 (#MMS-435P). Alexa Fluor secondary antibodies were purchased from Life  
524 Technologies. The DNA construct encoding Lifeact-GFP was provided by Roland  
525 Wedlich Soldner (MPI Biochemistry, Martinsried), pTagRFP-mito was purchased from  
526 Evrogen (#FP147), pmRFP-LC3 was a gift from Tamotsu Yoshimori (Addgene  
527 plasmid # 21075). LysoTracker Deep Red came from ThermoFisher (#L12492). The  
528 remaining reagents were obtained from Electron Microscopy Sciences or Sigma  
529 Aldrich unless otherwise specified.

530

531 *Neuronal cultures*

532 Hippocampal neurons were cultured from embryonic day 18 (E18) embryos from  
533 Sprague Dawley rats. All experiments were approved by The University of Queensland  
534 Animal Ethics Committee. Hippocampal neurons were prepared as described  
535 previously<sup>8</sup> and were plated on either glass coverslips (for confocal microscopy), plastic  
536 dishes (for EM) or in microfluidic chambers (Xona, #RD450) according to the  
537 manufacturer's protocol<sup>57</sup>. For the pretreated groups, live-imaging of approximate 5  
538 (30×12  $\mu$ m) regions of interest (ROIs) was performed 2 h after the CTB labelling. For  
539 blebbistatin treatment, conditioned culture medium containing blebbistatin (10  $\mu$ M)

540 was only added to the middle and/or terminal chambers of the 6-well or 4-well  
541 microfluidic chambers (Xona, #TCND500; #RD450) to exclude its effect on the soma.  
542 For the short-term blebbistatin treatment, microfluidic devices were immediately  
543 returned to the 37°C imaging chamber for live imaging, and approximately 5 ROIs were  
544 imaged within a total duration of 60 min. For long-term blebbistatin treatment,  
545 microfluidic devices were returned to a 37°C CO<sub>2</sub> incubator for an additional 2h before  
546 continuing the live imaging.

547

### 548 *Confocal microscopy*

549 Stimulation and labelling were carried out on rat hippocampal neurons cultured in  
550 microfluidic chambers between day *in vitro* 14 (DIV14). Briefly, the culture medium  
551 was removed from all chambers and the neurons were incubated for 5 min at 37°C in  
552 labelling buffer (15 mM HEPES, 95 mM NaCl, 56 mM KCl, 2.2mM CaCl<sub>2</sub>, 0.5mM  
553 MgCl<sub>2</sub>, 5.6mM D-glucose, 0.5 mM ascorbic acid, 0.1% bovine serum albumin (BSA),  
554 pH 7.4), with 50 ng/ml CTB-Af555 or CTB-Af647 added to the nerve terminal  
555 chambers only. For LysoTracker labelling, the incubation time was 30 min. Neurons  
556 were then washed 3 times with warm neurobasal medium and returned to the original  
557 conditioned growth medium for 2 h prior to imaging. Images were acquired with a Zeiss  
558 LSM710 inverted microscope maintained at 37°C and 5% CO<sub>2</sub>, and movies were  
559 analysed for carrier kinetics using the spot function of Imaris software (Imaris7.7-9.2,  
560 Bitplane). Kymographs were generated using ImageJ software (NIH) using the plugin  
561 Multi-Kymograph for ImageJ. For immunofluorescence microscopy of fixed cells, the  
562 microfluidic devices were removed and neurons were subsequently fixed for 2-4 h at  
563 4°C with phosphate buffered saline (PBS) containing 4% paraformaldehyde and 4%  
564 sucrose, followed by immunostaining as previously described<sup>27</sup>. Permeabilization was

565 performed using 0.1% saponin, 0.2% gelatin, and 1% BSA in PBS. Imaging was carried  
566 out on a Zeiss LSM710 confocal microscope and analysed with Zen (Zeiss) and ImageJ  
567 softwares. All images were compiled using Illustrator CS 5.1 (Adobe).

568

#### 569 *Imaris tracing of axonal cargoes*

570 Time-lapse movies of CTB-positive or LysoTracker-positive carriers were analysed for  
571 carrier kinetics using the spot function of Imaris software (Imaris7.7-9.2, Bitplane). In  
572 brief, region growth was enable (threshold 50, diameter from border mode), estimated  
573 diameter 0.75  $\mu\text{m}$ , tracing with autogressive motion (Max Distance 2  $\mu\text{m}$ , Max Gap  
574 size 0). Resulted trajectories were filtered with duration > 10 s and instant speed > 0.07  
575  $\mu\text{m/s}$ . Average speed are calculated as track length divided by track duration. For  
576 LysoTracker-positive carriers that bleaches rapidly, only the diameter of the first time  
577 point in each trajectory were used as the diameter for size grouping.

578

#### 579 *Co-labelling of F-actin and NM-II for SR-SIM*

580 Cultured rat hippocampal neurons were fixed at DIV14. For dual-colour imaging of  
581 actin and NM-IIB, the fixation protocol was modified from that previously established  
582 for maintaining actin ultrastructure<sup>18</sup>. Briefly, the samples were initially fixed in 4%  
583 paraformaldehyde dissolved in cytoskeleton buffer (CB, 10 mM MES, 150 mM NaCl,  
584 5 mM EGTA, 5 mM glucose and 5 mM  $\text{MgCl}_2$ , pH 6.1) for 30 min at room temperature  
585 and then blocked with antibody dilution buffer (2% BSA with 0.1% Triton X-100 in  
586 PBS) for 1 h at room temperature, after which the primary antibody (NM-IIB, diluted  
587 1 in 500) and phalloidin-Af647 (0.14  $\mu\text{M}$ ) in 2% BSA in PBS were applied to the dish  
588 and incubated at 4°C overnight. Donkey anti-rabbit secondary antibody (Thermofisher,  
589 #A-21206) was diluted at 1/500 and incubated for 1h at room temperature. Samples

590 were immediately mounted in Vectashield medium (Vector Laboratories, #H-1000) for  
591 SIM imaging. For the Triton X-100 extraction experiment, neurons were first treated  
592 with the extraction buffer (4% paraformaldehyde, 0.1% (v/v) Triton X-100, 1  $\mu\text{g}/\text{ml}$   
593 phalloidin in CB) for 45 s before the fixation and staining steps.

594

### 595 *Structured illumination microscopy*

596 Imaging of live or fixed samples was performed using an ELYRA PS1 SR-SIM system  
597 (Zeiss) equipped with a 100x objective ( $\alpha$  Plan-Apochromat 100 $\times$ /1.46 oil-immersion  
598 DIC M27) and a CMOS camera (PCO Scientific). For live-imaging of the Af555-CTB-  
599 labelled neurons, images were obtained with the Fastframe mode (100 ms exposure  
600 time, a time serie of 200 frames at 1.44 s intervals, a SIM grating size of 42  $\mu\text{m}$  at 561  
601 nm wavelengths, and using 3 rotations). For fixed and stained samples, images were  
602 obtained by acquiring z-stacks of 10-16 slices with a spacing of 0.101  $\mu\text{m}$ , an exposure  
603 time of 100 ms, a SIM grating size of 42-51  $\mu\text{m}$ , and using five rotations. 3D structured  
604 illumination images were then aligned and processed using the Zen software. For cross-  
605 correlation analysis, line profiles were selected based on the standard of the existence  
606 of at least 4 consecutive NM-II peaks in a single axon shafts. The intensity profiles of  
607 each of the channels were then obtained using the Multichannel plot profile function of  
608 BAR collection (DOI10.5281/zenodo.28838) in ImageJ software (NIH). The auto-  
609 correlation or cross-correlation rate between the different channels was then examined  
610 using the xcorr function of Matlab. The correlation values for each axon segment were  
611 averaged and plotted.

612

### 613 *Simulated emission depletion (STED) microscopy*

614 Cultured rat hippocampal neurons (DIV14-17) cultured in glass bottom dishes were  
615 imaged on a Leica SP8 confocal with STED 3X. (DMI8 stand with 775nm, 660nm  
616 592nm STED lasers and a white-light tuneable laser for excitation). Images were  
617 acquired using the HC plan apochromat 100x 1.4 NA oil immersion objective using  
618 Leica LASX software with 3 frame accumulations as multi-slice z-stacks.  
619 Deconvolution was performed using up to 40 cycles of iterative deconvolution using  
620 Huygens Professional. Images were visualised and maximum intensity projected using  
621 FIJI (NIH).

622

### 623 *Assessment of actin MPS and NM-II abundance*

624 Periodic cytoskeletal structures (MPS) are defined as the axonal regions with at least  
625 4 consecutive actin or NM-II peaks along the longitudinal direction. 5-7 of 5  
626  $\mu\text{m} \times 5 \mu\text{m}$  ROIs were selected along the axons in each 3D-SIM image (50  
627  $\mu\text{m} \times 50 \mu\text{m}$ ). In each ROI, the length of axon with F-actin MPS was measured with  
628 ImageJ by a trained observer blind to the treatment conditions. In the same ROI, the  
629 particle number of NM-II staining was also automatically quantified with the  
630 Analyse Particle plugin of FIJI. MPS or NM-II abundance were then calculated as  
631 the percentage of segments length with an MPS or particle number over the total  
632 length of axons in the ROI respectively.

633

### 634 *Electron microscopy*

635 Rat hippocampal neurons cultured in microfluidic devices (14-17 DIV) were treated as  
636 described for confocal microscopy<sup>27</sup>, except that 10  $\mu\text{g}/\text{ml}$  CTB-HRP was added to the  
637 nerve terminal chambers for the period of stimulation. Cells were returned to growth  
638 medium for 4 h prior to fixation. All cells were fixed in 2.5% glutaraldehyde for 24 h.

639 Following fixation, they were processed for 3, 39-diaminobenzidine (DAB)  
640 cytochemistry using the standard protocol. Fixed cells were contrasted with 1% osmium  
641 tetroxide and 4% uranyl acetate prior to dehydration and embedding in LX-112 resin<sup>58</sup>.  
642 Sections (~50 nm) were cut using an ultramicrotome (UC64; Leica). To quantify CTB-  
643 HRP endocytosis, presynaptic regions were visualized at 60,000x using a transmission  
644 electron microscope (model 1011; JEOL) equipped with a Morada cooled CCD camera  
645 and the iTEM AnalySIS software. Membrane-bound compartments within the cell  
646 soma proximal region of the microfluidic channel were analysed, and the axon diameter  
647 measured using ImageJ software.

648

#### 649 *HMM-Bayes analysis*

650 Hidden Markov model (HMM) method was used to predict the particle hidden states  
651 and the state transition probabilities from experimental trajectories. By using Bayesian  
652 model selection in the inference process, the simplest mobility model can be selected  
653 to describe these trajectories in an objective manner<sup>59</sup>. We analysed the trajectories  
654 from each cell of interest using HMM-Bayes software<sup>60</sup>. A maximum of 2 hidden states  
655 was set to describe the trajectory movements, diffusion motion (D) and active transport  
656 state (DV), which were used to describe the stalled state and the fast-moving state,  
657 respectively. In our cases, at least 10 channel ROIs were quantified for the control group  
658 and the blebbistatin-treated group, with corresponding trajectory numbers being 126  
659 and 190 respectively. The D state with a low apparent diffusion coefficient state  
660 representing the immobile unattached movement. The DV state, which could be  
661 described by averaged velocity, represents the active transport attached movement. All  
662 of the analyses were performed using Matlab (R2016a, MathWorks, Inc.). The average  
663 step sizes of different transport states was calculated from all D-DV models.



664

665 *Statistics*

666 We used GraphPad Prism 7 (GraphPad Inc.) for statistical analyses. Results are reported  
667 as mean  $\pm$  s.e.m. For group comparisons, two-tailed nonparametric *t*-tests or paired *t*-  
668 tests were executed. *P* values  $< 0.05$  indicated statistical significance. No statistical  
669 methods were used to predetermine sample sizes. Data distribution was assumed to be  
670 normal, but this was not formally tested. There was no formal randomization. Data  
671 collection and analysis were performed by different operators, who were blind to the  
672 conditions of the experiments.

673

674 **References**

- 675 1. Tojima, T. & Kamiguchi, H. Exocytic and endocytic membrane trafficking in  
676 axon development. *Dev Growth Differ* **57**, 291-304 (2015).
- 677 2. Barford, K., Deppmann, C. & Winckler, B. The neurotrophin receptor signaling  
678 endosome: Where trafficking meets signaling. *Dev Neurobiol* **77**, 405-418  
679 (2017).
- 680 3. Liewald, D., Miller, R., Logothetis, N., Wagner, H.J. & Schuz, A. Distribution  
681 of axon diameters in cortical white matter: An electron-microscopic study on  
682 three human brains and a macaque. *Biol Cybern* **108**, 541-57 (2014).
- 683 4. Perge, J.A., Niven, J.E., Mugnaini, E., Balasubramanian, V. & Sterling, P. Why  
684 do axons differ in caliber? *J Neurosci* **32**, 626-38 (2012).
- 685 5. Mizushima, N., Ohsumi, Y. & Yoshimori, T. Autophagosome formation in  
686 mammalian cells. *Cell Struct Funct* **27**, 421-9 (2002).
- 687 6. McBride, H.M., Neuspiel, M. & Wasiak, S. Mitochondria: More than just a  
688 powerhouse. *Curr Biol* **16**, R551-60 (2006).
- 689 7. Altick, A.L., Baryshnikova, L.M., Vu, T.Q. & von Bartheld, C.S. Quantitative  
690 analysis of multivesicular bodies (mvbs) in the hypoglossal nerve: Evidence that  
691 neurotrophic factors do not use mvbs for retrograde axonal transport. *J Comp*  
692 *Neurol* **514**, 641-57 (2009).
- 693 8. Wang, T., *et al.* Control of autophagosome axonal retrograde flux by  
694 presynaptic activity unveiled using botulinum neurotoxin type-a. *Journal of*  
695 *Neurochemistry* **134**, 165 (2015).
- 696 9. Yin, X., *et al.* Proteolipid protein-deficient myelin promotes axonal  
697 mitochondrial dysfunction via altered metabolic coupling. *J Cell Biol* **215**, 531-  
698 542 (2016).

- 699 10. Giacci, M.K., *et al.* Three dimensional electron microscopy reveals changing  
700 axonal and myelin morphology along normal and partially injured optic nerves.  
701 *Sci Rep* **8**, 3979 (2018).
- 702 11. Maia, P.D., *et al.* Diagnostic tools for evaluating the impact of focal axonal  
703 swellings arising in neurodegenerative diseases and/or traumatic brain injury. *J*  
704 *Neurosci Methods* **253**, 233-43 (2015).
- 705 12. Zhang, Y., *et al.* Modeling of the axon membrane skeleton structure and  
706 implications for its mechanical properties. *PLoS Comput Biol* **13**, e1005407  
707 (2017).
- 708 13. Wortman, J.C., *et al.* Axonal transport: How high microtubule density can  
709 compensate for boundary effects in small-caliber axons. *Biophys J* **106**, 813-23  
710 (2014).
- 711 14. Fan, A., Tofangchi, A., Kandel, M., Popescu, G. & Saif, T. Coupled  
712 circumferential and axial tension driven by actin and myosin influences in vivo  
713 axon diameter. *Sci Rep* **7**, 14188 (2017).
- 714 15. Narayanareddy, B.R., Vartiainen, S., Hariri, N., O'Dowd, D.K. & Gross, S.P. A  
715 biophysical analysis of mitochondrial movement: Differences between  
716 transport in neuronal cell bodies versus processes. *Traffic* **15**, 762-71 (2014).
- 717 16. Leite, S.C., *et al.* The actin-binding protein alpha-adducin is required for  
718 maintaining axon diameter. *Cell Rep* **15**, 490-498 (2016).
- 719 17. Pesaresi, M., *et al.* Axon diameter and axonal transport: In vivo and in vitro  
720 effects of androgens. *Neuroimage* **115**, 191-201 (2015).
- 721 18. Xu, K., Zhong, G. & Zhuang, X. Actin, spectrin, and associated proteins form  
722 a periodic cytoskeletal structure in axons. *Science* **339**, 452-6 (2013).

- 723 19. Han, B., Zhou, R., Xia, C. & Zhuang, X. Structural organization of the actin-  
724 spectrin-based membrane skeleton in dendrites and soma of neurons. *Proc Natl*  
725 *Acad Sci U S A* **114**, E6678-E6685 (2017).
- 726 20. Zhong, G., *et al.* Developmental mechanism of the periodic membrane skeleton  
727 in axons. *Elife* **3** (2014).
- 728 21. He, J., *et al.* Prevalent presence of periodic actin-spectrin-based membrane  
729 skeleton in a broad range of neuronal cell types and animal species. *Proc Natl*  
730 *Acad Sci U S A* **113**, 6029-34 (2016).
- 731 22. Arnold, D.B. & Gallo, G. Structure meets function: Actin filaments and myosin  
732 motors in the axon. *J Neurochem* **129**, 213-220 (2014).
- 733 23. Papadopoulos, A., *et al.* Activity-driven relaxation of the cortical actomyosin ii  
734 network synchronizes munc18-1-dependent neurosecretory vesicle docking.  
735 *Nat Commun* **6**, 6297 (2015).
- 736 24. Berger, S.L., *et al.* Localized myosin ii activity regulates assembly and plasticity  
737 of the axon initial segment. *Neuron* **97**, 555-570 e6 (2018).
- 738 25. Kovacs, M., Toth, J., Hetenyi, C., Malnasi-Csizmadia, A. & Sellers, J.R.  
739 Mechanism of blebbistatin inhibition of myosin ii. *J Biol Chem* **279**, 35557-63  
740 (2004).
- 741 26. Tammineni, P., Ye, X., Feng, T., Aikal, D. & Cai, Q. Impaired retrograde  
742 transport of axonal autophagosomes contributes to autophagic stress in  
743 alzheimer's disease neurons. *Elife* **6** (2017).
- 744 27. Wang, T., *et al.* Flux of signalling endosomes undergoing axonal retrograde  
745 transport is encoded by presynaptic activity and trkb. *Nat Commun* **7**, 12976  
746 (2016).

- 747 28. Joensuu, M., *et al.* Visualizing endocytic recycling and trafficking in live  
748 neurons by subdiffractional tracking of internalized molecules. *Nat Protoc* **12**,  
749 2590-2622 (2017).
- 750 29. Joensuu, M., *et al.* Subdiffractional tracking of internalized molecules reveals  
751 heterogeneous motion states of synaptic vesicles. *J Cell Biol* **215**, 277-292  
752 (2016).
- 753 30. Rai, A.K., Rai, A., Ramaiya, A.J., Jha, R. & Mallik, R. Molecular adaptations  
754 allow dynein to generate large collective forces inside cells. *Cell* **152**, 172-82  
755 (2013).
- 756 31. Mallik, R., Petrov, D., Lex, S.A., King, S.J. & Gross, S.P. Building complexity:  
757 An in vitro study of cytoplasmic dynein with in vivo implications. *Curr Biol* **15**,  
758 2075-85 (2005).
- 759 32. Chowdary, P.D., Che, D.L., Zhang, K. & Cui, B. Retrograde ngf axonal  
760 transport--motor coordination in the unidirectional motility regime. *Biophys J*  
761 **108**, 2691-703 (2015).
- 762 33. Riedl, J., *et al.* Lifeact: A versatile marker to visualize f-actin. *Nat Methods* **5**,  
763 605-7 (2008).
- 764 34. Ganguly, A., *et al.* A dynamic formin-dependent deep f-actin network in axons.  
765 *J Cell Biol* **210**, 401-17 (2015).
- 766 35. Gormal, R.S., Nguyen, T.H., Martin, S., Papadopoulos, A. & Meunier, F.A. An  
767 acto-myosin ii constricting ring initiates the fission of activity-dependent bulk  
768 endosomes in neurosecretory cells. *J Neurosci* **35**, 1380-9 (2015).
- 769 36. Ha, J., *et al.* A neuron-specific cytoplasmic dynein isoform preferentially  
770 transports trkb signaling endosomes. *J Cell Biol* **181**, 1027-39 (2008).

- 771 37. Qu, Y., Hahn, I., Webb, S.E., Pearce, S.P. & Prokop, A. Periodic actin structures  
772 in neuronal axons are required to maintain microtubules. *Mol Biol Cell* **28**, 296-  
773 308 (2017).
- 774 38. Hu, S., *et al.* Long-range self-organization of cytoskeletal myosin ii filament  
775 stacks. *Nat Cell Biol* **19**, 133-141 (2017).
- 776 39. Beach, J.R., *et al.* Nonmuscle myosin ii isoforms coassemble in living cells.  
777 *Curr Biol* **24**, 1160-6 (2014).
- 778 40. Yi, J.Y., *et al.* High-resolution imaging reveals indirect coordination of opposite  
779 motors and a role for lis1 in high-load axonal transport. *J Cell Biol* **195**, 193-  
780 201 (2011).
- 781 41. Maday, S., Wallace, K.E. & Holzbaaur, E.L. Autophagosomes initiate distally  
782 and mature during transport toward the cell soma in primary neurons. *J Cell*  
783 *Biol* **196**, 407-17 (2012).
- 784 42. Beach, J.R., Licate, L.S., Crish, J.F. & Egelhoff, T.T. Analysis of the role of  
785 ser1/ser2/thr9 phosphorylation on myosin ii assembly and function in live cells.  
786 *BMC Cell Biol* **12**, 52 (2011).
- 787 43. Hancock, W.O. Bidirectional cargo transport: Moving beyond tug of war. *Nat*  
788 *Rev Mol Cell Biol* **15**, 615-28 (2014).
- 789 44. Vale, R.D., Malik, F. & Brown, D. Directional instability of microtubule  
790 transport in the presence of kinesin and dynein, two opposite polarity motor  
791 proteins. *J Cell Biol* **119**, 1589-96 (1992).
- 792 45. Kapitein, L.C. & Hoogenraad, C.C. Which way to go? Cytoskeletal  
793 organization and polarized transport in neurons. *Mol Cell Neurosci* **46**, 9-20  
794 (2011).

- 795 46. Che, D.L., Chowdary, P.D. & Cui, B. A close look at axonal transport: Cargos  
796 slow down when crossing stationary organelles. *Neurosci Lett* **610**, 110-6  
797 (2016).
- 798 47. Chowdary, P.D., *et al.* Nanoparticle-assisted optical tethering of endosomes  
799 reveals the cooperative function of dyneins in retrograde axonal transport. *Sci*  
800 *Rep* **5**, 18059 (2015).
- 801 48. Bilsland, L.G., *et al.* Deficits in axonal transport precede ALS symptoms in vivo.  
802 *Proc Natl Acad Sci U S A* **107**, 20523-8 (2010).
- 803 49. Gennerich, A., Carter, A.P., Reck-Peterson, S.L. & Vale, R.D. Force-induced  
804 bidirectional stepping of cytoplasmic dynein. *Cell* **131**, 952-65 (2007).
- 805 50. Lalli, G., Bohnert, S., Deinhardt, K., Verastegui, C. & Schiavo, G. The journey  
806 of tetanus and botulinum neurotoxins in neurons. *Trends Microbiol* **11**, 431-7  
807 (2003).
- 808 51. Morris, R.L. & Hollenbeck, P.J. Axonal transport of mitochondria along  
809 microtubules and f-actin in living vertebrate neurons. *J Cell Biol* **131**, 1315-26  
810 (1995).
- 811 52. Belyy, V., *et al.* The mammalian dynein-dynactin complex is a strong opponent  
812 to kinesin in a tug-of-war competition. *Nat Cell Biol* **18**, 1018-24 (2016).
- 813 53. Cleary, F.B., *et al.* Tension on the linker gates the ATP-dependent release of  
814 dynein from microtubules. *Nat Commun* **5**, 4587 (2014).
- 815 54. Chereau, R., Saraceno, G.E., Angibaud, J., Cattaert, D. & Nagerl, U.V.  
816 Superresolution imaging reveals activity-dependent plasticity of axon  
817 morphology linked to changes in action potential conduction velocity. *Proc Natl*  
818 *Acad Sci U S A* **114**, 1401-1406 (2017).

- 819 55. Duan, R., *et al.* Spectrin is a mechanoresponsive protein shaping fusogenic  
820 synapse architecture during myoblast fusion. *Nat Cell Biol* **20**, 688-698 (2018).
- 821 56. Evans, M.D., Tufo, C., Dumitrescu, A.S. & Grubb, M.S. Myosin ii activity is  
822 required for structural plasticity at the axon initial segment. *Eur J Neurosci* **46**,  
823 1751-1757 (2017).
- 824 57. Taylor, A.M., *et al.* A microfluidic culture platform for cns axonal injury,  
825 regeneration and transport. *Nat Methods* **2**, 599-605 (2005).
- 826 58. Harper, C.B., *et al.* Dynamin inhibition blocks botulinum neurotoxin type a  
827 endocytosis in neurons and delays botulism. *J Biol Chem* **286**, 35966-76 (2011).
- 828 59. Persson, F., Linden, M., Unoson, C. & Elf, J. Extracting intracellular diffusive  
829 states and transition rates from single-molecule tracking data. *Nat Methods* **10**,  
830 265-9 (2013).
- 831 60. Monnier, N., *et al.* Inferring transient particle transport dynamics in live cells.  
832 *Nat Methods* **12**, 838-40 (2015).

833



834 **Acknowledgements**

835 This work was supported by grants from the Australian Research Council (ARC,  
836 DP170102402 to VA; ARC DE170100546 to TW) and the Australian National Health  
837 and Medical Research Council (NHMRC; GNT1138452 to VA and GNT1120381 to  
838 FAM). FAM is an NHMRC Senior Research Fellow (GNT1060075). TW is an ARC  
839 DECRA Fellow (DE170100546) and was previously supported by a The University of  
840 Queensland Postdoctoral Research Fellowship. HH and XJY were recipients of  
841 University of Queensland Research Training Scholarships. Imaging was performed at  
842 the Queensland Brain Institute's Advanced Microscopy Facility, generously supported  
843 by the Australian Government through the ARC LIEF Grant (LE130100078 to FAM).  
844 Electron microscopy was performed at the Australian Microscopy and Microanalysis  
845 Facility, The University of Queensland. The authors would like to thank Rowan  
846 Tweedale for editing the manuscript, and Joanne Jang, Rumelo Amor, Nicholas Condon,  
847 Luke Hammond, Nick Valmas and Rachel Gormal for expert technical assistance.

848

849 **Author contributions**

850 FAM and TW designed the study, supervised the project and wrote the manuscript. TW  
851 performed live-imaging microscopy, confocal and SIM experiments and analysed data.  
852 WL performed HMM separation and assisted with data analysis. SM designed and  
853 performed EM experiments and helped with data analysis. AP designed and performed  
854 the analysis of particle speed and swap, and helped with SIM. GS helped to develop the  
855 staining protocol for dual-colour SIM. XJY and HH helped with primary neuronal  
856 culture, transfection, analysis of LC3-mRFP data. VA supervised works conducted by  
857 XJY, HH and WL, and edited the manuscript. VL and PP helped with the edition of the

858 manuscript and the figures. All authors discussed the results and commented on the  
859 manuscript.

860

### 861 **Competing Interests**

862 The authors declare no competing interest.

863

### 864 **Materials & correspondence**

865 Correspondence and requests for materials should be addressed to Prof. Frederic A.

866 Meunier ([f.meunier@uq.edu.au](mailto:f.meunier@uq.edu.au)) and Dr Tong Wang ([t.wang4@uq.edu.au](mailto:t.wang4@uq.edu.au)).

867

### 868 **Data availability**

869 All other data supporting the findings of this study are available from the corresponding

870 authors upon reasonable request.

871

872 **Figure legends**

873 **Figure 1. The speed of retrograde axonal transport cargoes is inversely correlated**  
874 **with their size.**

875 (a) Microfluidic chambers to isolate unidirectional axon bundles, bar =1 cm (adapted  
876 from [Xonamicrofluidics.com](http://Xonamicrofluidics.com)). (b) Schematic diagram of the pulse-chase labelling  
877 process. Cultured hippocampal neurons were grown in a microfluidic device for 14  
878 days *in vitro* (DIV). The nerve terminal chamber was incubated with fluorescently  
879 tagged CTB (50 ng/ml) for 5 min or Lysotracker Deep Red (50 nM) for 30 min (pulse).  
880 After thorough washes and a 2h chase. (c) Representative images of cultured neurons,  
881 showing the restriction of retrograde CTB surface labelling to nerve terminals and the  
882 position of the observation window (white box). Scale bar = 50  $\mu$ m. (d) The axonal  
883 retrograde transport of CTB or Lysotracker was monitored, at the level of the proximal  
884 axon shafts or in the nerve terminal chamber, respectively. (e) Time-lapse images of  
885 CTB carriers. Top panels: CTB labelling and tracing trajectories within the axon  
886 channels. Trajectories of small (#1, diameter  $\leq$  0.5  $\mu$ m) and large (#2, diameter  $>$  0.5  
887  $\mu$ m) carriers are magnified in the bottom panels, respectively. (f) Representative  
888 kymographs of CTB-positive cargoes along a single axon, depicting track  
889 displacements of small and large carriers. x-bar = 10  $\mu$ m; y-bar = 10 s. (g) Grouped  
890 analysis of the average speeds of CTB cargoes with small (diameter  $\leq$  0.5  $\mu$ m) and  
891 large (diameter  $>$  0.5  $\mu$ m) diameters. Data represent mean  $\pm$  s.e.m (small, n=187, large  
892 n=185 tracks from 3 independent preparations; two-tailed unpaired t-test, \*\*\* $p$ <0.001).  
893 (h) Pearson's coefficient of the speed and diameter of retrograde Lysotracker-positive  
894 and CTB-positive cargoes. Data represent mean  $\pm$  s.e.m from 3 independent  
895 preparations (random, n=3 simulated data sets; Lysotracker, n=6 ; CTB, n=14; n

896 represents the number of axon channels analysed; the single value of the average  
897 correlation coefficient between the size and speed of all trajectories in each axon  
898 channel was calculated and used for the plot. 3 Independent groups of Gaussian-  
899 distributed random numbers were generated using the *normrnd* function of Matlab.  
900 Two-tailed unpaired t-test,  $**p<0.01$ ,  $*p<0.05$ ).

901

902 **Figure 2. The size of axonal cargoes correlates with the diameter of the axon.**

903 (a) Brightfield image of DIV14 rat hippocampal neurons cultured in a microfluidic  
904 device with the region selected for EM outlined. Scale bar = 250  $\mu\text{m}$ . (b) Representative  
905 electron micrographs showing the axonal diameter measurements with cargo (red) or  
906 without cargo (blue), and the associated cargo size (white). Scale bar = 0.5  $\mu\text{m}$  (c)  
907 Electron micrographs of axon bundles from hippocampal neurons cultured in  
908 microfluidic devices. (i-iv) Axon diameters with and without cargo are marked with red  
909 and blue arrows, respectively. (i) Endosome = black arrow, (i-iii) Mitochondria = white  
910 arrowheads, autophagosome = black arrowheads. (iv) Inner diameters of cargoes are  
911 marked with white arrows. Bars = 500 nm. (d) Quantification of axon diameters with  
912 cargo and without cargo. Data represent mean  $\pm$  s.e.m,  $n= 182$  (+ Cargo) and  $182$  (-  
913 Cargo) measurements from 2 independent preparations (two-tailed paired t-test,  
914  $***p<0.001$ ). (e) Grouped quantification of axonal diameter as a function of binned  
915 vesicle size. Data represent mean  $\pm$  s.e.m; for the + Cargo group from left to right:  
916  $n=104$ , 23, 41 and 14 measurements; for the - Cargo group from left to right:  $n=104$ ,  
917 23, 41 and 22 measurements, data were from 2 independent preparations (two-tailed  
918 unpaired t-test,  $*p<0.05$ ;  $***p<0.001$ ). (f) Cross-correlation analysis of cargo size and  
919 axonal diameter. Linear regressions were performed with the 182 paired measurements

920 of axonal and cargo diameters of the (+ Cargo) group, data from 2 independent  
921 preparations.

922

923 **Figure 3. Large retrograde cargoes produce “black-holes” within the axons of**  
924 **Lifect-GFP-expressing neurons.**

925 (a) Rat hippocampal neurons transfected with Lifect-GFP were pulse-labelled with  
926 CTB for 5 min and immediately subjected to 2D-SIM imaging; boxed regions of axonal  
927 segments are shown on the right. Relative localization of plasma membrane (CTB-  
928 labelled, arrowheads), F-actin (Lifect-GFP; asterisk) and cytosolic actin (Lifect-GFP;  
929 arrows). Bar = 10  $\mu\text{m}$  (right), 1  $\mu\text{m}$  (left). (b) Rat hippocampal neurons were transfected  
930 with Lifect-GFP and imaged with 3D-SIM. Top: a representative maximum projection  
931 of 3D-SIM of Lifect-GFP expressing axons are shown; Bar = 5  $\mu\text{m}$ . Bottom: magnified  
932 regions of interest (ROIs) in top panel, arrowheads indicate black-holes with low  
933 Lifect-GFP signals within the axon. Bar = 1  $\mu\text{m}$ . (c) Quantification of axon diameters  
934 with (+) and without (-) black-holes. Data represent mean  $\pm$  s.e.m from 3 independent  
935 preparations (+ black-hole, n=29, - black-hole, n=29 axons; two-tailed unpaired *t*-test,  
936 \*\*\**p*<0.001). (d-e) Cultured hippocampal neurons grown in a microfluidic device were  
937 transfected on DIV12 with Lifect-GFP and co-transfected with either LC3-mRFP  
938 (autophagosome) (d), Rab7-mRFP (late endosome) (e) or Mito-TagRFP (mitochondria)  
939 (f), and subjected to time-lapse imaging on DIV 14. Representative dual-colour 3D-  
940 SIM projections of neurons expressing Lifect-GFP and with different subcellular  
941 markers are magnified in right panels, and overlapping regions are annotated. Bar = 5  
942  $\mu\text{m}$ . (g) Quantification of axon diameters with (+) and without (-) annotated markers.  
943 Data represent mean  $\pm$  s.e.m (n=10 axons for each marker from 3 independent cultures;  
944 two-tailed unpaired *t*-test, \*\**p*<0.01; \*\*\**p*<0.001). (h-i) Representative dual-colour

945 3D-SIM projections of axons expressing Lifeact-GFP, which were co-labelled with the  
946 retrograde cargo marker CTB **(h)** or DIC<sup>1B</sup> **(i)**. Boxed regions are magnified in right  
947 panels, overlapping regions are annotated. Bar = 2  $\mu\text{m}$  **(h)** and 5  $\mu\text{m}$  **(i)**.

948

949 **Figure 4. The transit of cargo causes a transient radial expansion of the axon.**

950 **(a)** Rat hippocampal neurons cultured in a glass-bottom dish were transfected with  
951 Lifeact-GFP (DIV 12) and imaged by time-lapse SIM (DIV 14). Representative live  
952 axons with cargo-associated black-holes passing through are shown, with inset  
953 demonstrating the Gaussian fittings of the annotated line transection of axon. Bar = 0.5  
954  $\mu\text{m}$  (inset). **(b)** Time-lapse images of bracketed region in A, showing the axonal  
955 diameter fluctuation as the cargo (indicated with red bar) transits. **(c)** Plot of the distance  
956 between axon membranes against time. **(d-e)** Live-confocal imaging of axons carrying  
957 CTB-positive **(c)** or LysoTracker-positive **(d)** cargoes. Magnified images of the boxed  
958 region are shown in the lower panels, and moving cargoes are indicated with  
959 arrowheads. Bar = 10  $\mu\text{m}$ .

960

961 **Figure 5. Short-term inactivation of NM-II increases the axon diameter without**  
962  **affecting the actin ring periodicity.**

963 **(a)** SIM images of a Lifeact-GFP-expressing axon from a DIV14 rat hippocampal  
964 neuron, before and after short-term blebbistatin treatment (10  $\mu\text{M}$ , 60 min). Boxed  
965 regions are magnified in right panels. Axon diameter with and without cargoes is  
966 indicated by arrowheads and arrows respectively. Bar = 0.4  $\mu\text{m}$ . **(b)** Axon diameter  
967 quantification. Data represent mean  $\pm$  s.e.m, n=29, 29, 37, 37 axons from left to right.  
968 Values were measured from 3 independent cultures (two-tailed unpaired t-test,  
969 \*\*\* $p < 0.001$ ) **(c)** Analysis of axon diameter fluctuation. Data represent mean  $\pm$  s.e.m,

970 n=29 (pre), 22 (+BLB) axons from left to right. Values were measured from 3  
971 independent cultures (two-tailed unpaired t-test, \*\*\* $p < 0.001$ ). **(d)** SIM images of  
972 endogenous F-actin (phalloidin) along the axon of a DIV14 rat hippocampal neuron  
973 before and after short-term blebbistatin treatment (10  $\mu$ M, 60 min). Bracketed regions  
974 are magnified on the right, and the diameters of actin rings are shown below. **(e, f)**  
975 Comparison of periodic actin spacing distribution **(e)** and average value **(f)** in control  
976 and blebbistatin-treated neurons. Data represent mean  $\pm$  s.e.m, n=300 (Control), 316  
977 (+BLB) for periodicity quantification. **(g)** Autocorrelation analysis of the actin  
978 periodicity of control and blebbistatin-treated axons. Data represent mean  $\pm$  s.e.m, n =  
979 10 (Control) and 8 (+BLB) axon segments were measured. **(h)** Distribution of actin  
980 diameters in control and blebbistatin-treated axons. Data represent mean  $\pm$  s.e.m, n =  
981 42 (Control) and 46 (+BLB) actin rings diameters were measured. **(i)** Quantification of  
982 actin ring diameter fluctuations; the diameters per 10  $\mu$ m axon segments were measured  
983 and quantified. Data represent mean  $\pm$  s.e.m, n=11 (Control) and 11 (+BLB) axon  
984 segments were analysed. Values were measured from 3 independent cultures (two-  
985 tailed unpaired t-test, n.s. no significant difference; \*\* $p < 0.05$ ; \*\*\* $p < 0.001$ ).

986

987 ***Figure 6. NM-II immunostaining reveals a periodic pattern that correlates with the***  
988 ***periodic actin rings along the axons.***

989 **(a)** Dual-colour SIM images of endogenous F-actin (phalloidin) and NM-IIB in control  
990 and blebbistatin-treated axons of DIV14 rat hippocampal neurons. Boxed regions are  
991 magnified in right panels. Bar = 1  $\mu$ m (left) and 0.5  $\mu$ m (right). Discrete distributions  
992 of NM-II and actin are marked with arrows in bottom panels. **(b)** A line profile was  
993 used to characterize the periodic actin ring and NM-II structures. Overlapping and  
994 alternating peaks are marked with arrows and arrowheads respectively. **(c-e)**

995 Comparison of NM-II distribution in control and short-term (60 min) blebbistatin-  
996 treated axons. Due to the staining efficiency of the NM-II antibody, only the spacing  
997 between at least 4 consecutive NM-II puncta were analysed. The Gaussian distribution  
998 (c) autocorrelation (d) and scattered plot (e) of NM-II spacing are shown. Data  
999 represent mean  $\pm$  s.e.m, n = 8 (pre) and 9 (+BLB) axon segments were analysed for  
1000 autocorrelation; n = 262 (Control), 261 (+BLB) NM-II puncta were analysed for  
1001 periodic distribution. Data are from 3 independent cultures (two-tailed unpaired t-test,  
1002 n.s. no significant difference). (f) Comparison of NM-II and actin ring cross-correlation  
1003 in control and short-term (60 min) blebbistatin-treated axons; significant reduction of  
1004 cross-correlation after blebbistatin treatment is annotated at 0 nm shifts. Data represent  
1005 mean  $\pm$  s.e.m; n = 5 (Control), 6 (+BLB) axon segments were analysed. Values were  
1006 from 3 independent cultures (two-tailed unpaired t-test, \*\*\* $p < 0.001$ ).

1007

1008 **Figure 7. Short-term inactivation of actomyosin-II reduces the efficiency of**  
1009 **retrograde axonal trafficking.**

1010 (a) DIV 14 rat hippocampal neurons were cultured in microfluidic devices, and the  
1011 axon segments were subjected to short-term blebbistatin treatment (10  $\mu$ M, 60 min).  
1012 Trajectories of CTB-positive cargoes in the axon channels were traced before (pre) and  
1013 after (+BLB) blebbistatin treatment. Bar = 10  $\mu$ m. (b, c) Track speed (trajectory  
1014 length/duration) of the CTB carriers (b) or LysoTracker carriers (c) before (pre) and  
1015 after (+BLB) blebbistatin treatment. The speeds of these carriers were sub-grouped  
1016 according to their diameters. Data represent mean  $\pm$  s.e.m, n=187, 185, 271, 286 (CTB)  
1017 and n=179, 342, 128, 573 (LysoTracker) trajectories from 3 independent cultures (two-  
1018 tailed unpaired t-test, \* $p < 0.05$ , \*\*\* $p < 0.001$ , n.s. no significant difference). The same  
1019 data of pre-treated groups were used in Figure 1G and Figure S1B. (d) Displacement-



1020 time plot of representative CTB trajectories. (i) Fast moving state, and (ii) stalled state,  
1021 as magnified on the right, with the back-and-forth movements marked with asterisks.  
1022  $\bar{x} = 10 \mu\text{m}$ ,  $\bar{y} = 20 \text{ s}$ . (e) Time ratio of cargo travelling in the reverse direction  
1023 (swap) to total time travelled. Data represent mean  $\pm$  s.e.m,  $n=28$  (Pre) and 34 (+BLB)  
1024 channels from 3 independent preparations (two-tailed unpaired t-test,  $***p<0.001$ ). (f)  
1025 Quantification of the frequency of CTB-labelled vesicles that cross the observation  
1026 window per minute. Data represent mean  $\pm$  s.e.m,  $n = 51$  (Pre) and 32 (+BLB 60')  
1027 channels from 3 independent preparations (two-tailed unpaired t-test,  $*p<0.05$ ). (g)  
1028 CTB trajectory displays stalled (D, blue) and fast-moving (DV, pink) motion states  
1029 inferred by HMM-Bayes analysis. Example of an annotated trajectory colour-coded  
1030 with the indicated motion states. The time line shows the temporal (s) sequence of the  
1031 inferred D and DV motion states. (h) Step sizes of the two motion states before (pre)  
1032 and after (+BLB) blebbistatin treatment. Data represent mean  $\pm$  s.e.m, from left to right,  
1033  $n= 126, 126, 190, 190$  different trajectories from 3 independent preparations (two-tailed  
1034 unpaired t-test,  $***p<0.001$ ).

1035

1036 **Figure 8. Long-term inhibition of actomyosin-II activity triggers accumulation of**  
1037 **stalled cargo in focal axonal swellings (FAS).**

1038 (a) Hippocampal neurons (DIV 14) expressing Lifeact-GFP were incubated with  
1039 blebbistatin ( $10 \mu\text{M}$ ) for the indicated durations. Time-lapse SIM images showing  
1040 morphological changes. The bracketed regions are magnified. Bar =  $2 \mu\text{m}$  (left);  $1 \mu\text{m}$   
1041 (right). (b) Percentage of axons with FAS following short-term (60 min) and long-term  
1042 (120 min) blebbistatin treatment. Data represent mean  $\pm$  s.e.m,  $n=10$  (Pre), 9 (+BLB,  
1043 60 min) and 10 (+BLB, 120 min) independent ROIs were analysed. (c-e) Representative  
1044 channel overlapping with CTB trajectories is shown in (c). Quantification of the track

1045 speed **(d)** and transverse frequency **(e)** of CTB carriers following long-term (120 min)  
1046 blebbistatin treatment. Bar = 10  $\mu$ m. Data represent mean  $\pm$  s.e.m; for track speed  
1047 analysis, n=185 (Pre), 286 (60 min) and 215 (120 min) trajectories, the same data sets  
1048 of large cargo speed in pre-treated groups were used in Fig. 1g and Fig. 7b; for  
1049 frequency analysis, n=51 (pre), 32 (60 min) and 13 (120 min) independent channel  
1050 ROIs were analysed. **(f)** DIV 14 hippocampal neurons expressing Lifeact-GFP and  
1051 LC3-mRFP were incubated with blebbistatin (10  $\mu$ M, 120 min), with the accumulated  
1052 autophagosome cargoes marked by asterisks. Kymograph of an axon is shown in the  
1053 bottom panel. x-bar = 10  $\mu$ m, y-bar = 60 s. **(g)** Quantification of the average speed of  
1054 LC3 cargoes, and the number of FAS accompanied with LC3 cargo accumulation **(h)**,  
1055 following long-term blebbistatin treatment. Data represent mean  $\pm$  s.e.m; for LC3 speed,  
1056 n= 72 (Pre), n=68 (120 min) trajectories; for the FAS percentage, n=10 (Pre), 9 (120  
1057 min) independent ROIs. All data were from 3 independent cultures (two-tailed unpaired  
1058 t-test, \* $p$ <0.05; \*\*\* $p$ <0.001). **(i)** Rat hippocampal neurons were co-transfected on  
1059 DIV12 with the Lifeact-mRFP and either myosin-II regulatory light chain wild-type or  
1060 S19AT18A mutant (MRLC<sup>mut</sup>-GFP) plasmids. On DIV14 the diameter fluctuations **(j)**  
1061 and FAS numbers per  $\mu$ m **(k)** of transfected axons were quantified. Data represent mean  
1062  $\pm$  s.e.m; for actin ring fluctuation **(j)**, n= 25 (wt), n=45 (mut) independent axonal  
1063 segments are measured; for the FAS counts **(k)**, n=9 (wt), 26 (mut) independent axons  
1064 are counted. Data were from 2 independent preparations (two-tailed unpaired t-test,  
1065 \*\*\* $p$ <0.001).

1066

1067 **Supplementary information**

1068 **Supplementary Figure 1. The speed of Lysotracker-positive cargoes is inversely**  
1069 **correlated with their size in axons of cultured hippocampal neurons.**

1070 **(a)** Representative time-lapse images of Lysotracker carriers at the nerve terminals of  
1071 DIV 14 rat hippocampal neurons. Top-left: Lysotracker labelling at nerve terminals as  
1072 isolated by the device. Top-right: Imaris tracing trajectories of the same region of  
1073 interest. Trajectories of small (1#, diameter  $\leq 0.5 \mu\text{m}$ ) and large (2#, diameter  $> 0.5 \mu\text{m}$ )  
1074 carriers were magnified in the bottom panels respectively. **(b)** Grouped analysis of  
1075 average speeds of Lysotracker-positive cargoes with small ( $\leq 0.5 \mu\text{m}$ ) and large ( $> 0.5$   
1076  $\mu\text{m}$ ) diameters, showing a significant difference. Data represent mean  $\pm$  s.e.m from 3  
1077 independent preparations (small,  $n=179$ , big  $n=342$  tracks; two-tailed unpaired t-test,  
1078  $***p<0.001$ ). The same data sets were also used in the pretreated group of Figure 7C.

1079

1080 **Supplementary Figure 2. Periodic distribution of F-actin rings along the axon of**  
1081 **hippocampal neurons.**

1082 **(a)** DIV14 rat axons were stained for endogenous F-actin (phalloidin) and imaged with  
1083 3D-SIM; two different boxed regions magnified with maximum z-projections shown in  
1084 the lower panels. Axon diameters were measured as the average of a  $1 \mu\text{m}$  segment. **(b)**  
1085 Periodic actin peaks were identified using the ‘find peak’ function of BAR collection  
1086 in Image J (SMA=1), along the line profiles as shown with dashed lines in 1# of **(a)**. x-  
1087 value of the peaks were extracted, and the distance between adjacent peaks was shown  
1088 in Fig. 5f, in both untreated (control) or short-term (60 min) blebbistatin-treated axons.  
1089 **(c)** Hippocampal neurons transfected at DIV12 with Lifeact-GFP and imaged with 3D-  
1090 SIM on DIV 14, comparison of wide-field and SIM images are made. Bracketed regions  
1091 are amplified in the lower panels. **(d)** Amplification of the boxed regions in **(c)**, periodic

1092 actin rings are indicated with arrows. Bar=0.5  $\mu\text{m}$ . **(e)** line profile of **(d)**, showing the  
1093 periodicity of the actin peaks. **(f)** More representative cases showing the periodic actin  
1094 rings using Lifeact-GFP transfected neurons. **(g)** Distribution of actin ring spacing.  
1095 Data represent mean  $\pm$  s.d., n=251 actin peaks for periodicity quantification. Values  
1096 were measured from 3 independent cultures.

1097

1098 *Supplementary Figure 3. NM-II immunostaining reveals a periodic pattern that*  
1099 *correlates with the periodic actin rings along the axon.*

1100 **(a)** DIV14 rat hippocampal neurons was stained for endogenous F-actin (Phalloidin)  
1101 and NM-IIB and imaged with dual-colour 3D-SIM, boxed regions are magnified with  
1102 individual z-stack planes shown, periodic structure of NM-II and actin are indicated  
1103 with arrows (green) and spots (red) respectively. **(b)** The NM-II and actin structures  
1104 resolved with 3D-SIM (right) were rendered into surface (right) using Imaris; boxed  
1105 regions are magnified to show the accuracy of the rendering. The colocalization of the  
1106 bracketed region is shown in the bottom panels. **(c)** Comparison of colocalization  
1107 between NM-II and actin rings before and after the 60 min blebbistatin treatment. Bar=  
1108 0.5  $\mu\text{m}$ . **(d)** The Manders coefficient reflecting the colocalization rate. Data represent  
1109 mean  $\pm$  s.e.m, n=30 (-BLB), 30 (+BLB) axon segments for fraction of the F-actin  
1110 overlapping with NM-II; data were from 3 independent cultures (two-tailed unpaired t-  
1111 test,  $**p < 0.01$ ). **(e)** Two-colour SIM images of endogenous F-actin (phalloidin) and  
1112 NM-II along the axons of control and Triton X-100-extracted axons. Bar = 1  $\mu\text{m}$ . **(f-h)**  
1113 Quantification of the percentage of axons bearing periodic actin rings **(f)**, NM-II puncta  
1114 number **(g)**, and the percentage change in these two parameters **(h)** in control and Triton  
1115 X-100-extracted axons (+Triton). Data represent mean  $\pm$  s.e.m, n=10 cells (Control)

1116 and 9 cells (Triton X-100) from 3 independent cultures (two-tailed unpaired t-test,  
1117  $**p<0.01$ ;  $***p<0.001$ ).

1118

1119 ***Supplementary Figure 4. Periodic NM-II filaments are perpendicular to the***  
1120 ***longitudinal axis of the axon.***

1121 **(a)** DIV 14 hippocampal neurons were stained with the antibody against the C-terminal  
1122 of NM-IIB ( $\alpha$ NM-IIB(ct)). Representative 3D-STED images showing the periodic  
1123 NM-II filaments in two different ROIs (1# and 2#). Bracketed regions are amplified  
1124 with NM-II filaments were marked out in the right panels, double arrows annotate the  
1125 direction of axonal longitudinal axis, single NM-II filament is amplified in bottom  
1126 panels with the angle to the longitudinal axis marked out. Bar=300 nm (right panels for  
1127 1# and 2#). **(b-c)** The quantification of the angle between NM-II filament and the  
1128 axonal axis **(b)** and the periodic spacing between NM-II filaments. Data represent mean  
1129  $\pm$  s.e.m, n=212 NM-II filaments from 3 independent cultures,  $R^2=0.982$  **(b)**.  $R^2=0.994$   
1130 **(c)**. **(d)** Schematic showing the dual-antibody labelling assay using both antibodies  
1131 recognizing the C-terminus ( $\alpha$ NM-IIB(ct)) and N-terminus ( $\alpha$ NM-IIB(nt)) of NM-IIB  
1132 filaments. **(e)** representative 3D-SIM images of the dual-antibody labelling assay, with  
1133 two dual-stained NM-IIB filaments amplified in the right panels. Double arrow  
1134 indicates the direction of axon axis.

1135

1136 ***Supplementary Figure 5. Short-term inactivation of NM-II causes the axon diameter***  
1137 ***expansion without affecting the microtubule structure or docking mitochondria.***

1138 **(a)** Schematic cartoon showing the structure of a 6-well microfluidic device. **(b)** Time-  
1139 lapse images showing the distribution of Af488 dye in the middle chamber of a 6-well  
1140 microfluidic device, indicating its restriction capacity. Bar = 50  $\mu$ m. **(c)** Axons of DIV

1141 14 hippocampal neurons were treated with blebbistatin (10  $\mu$ M) in the middle chamber  
1142 for 90 min. Representative images of the 3D-SIM time-lapse images of axons before  
1143 (Pre) and after blebbistatin treatment (+BLB). Value of z-axis is colour-coded. Scale  
1144 Bar = 5  $\mu$ m. Magnified images from the boxed regions and the corresponding Imaris  
1145 surface rendered images are shown in panels on the right. Bar=1  $\mu$ m. **(d-e)**  
1146 Quantification of changes in the axon diameter **(d)** and volume **(e)** before and after  
1147 blebbistatin treatment. Data represent mean  $\pm$  s.e.m, for diameter quantification n=10  
1148 (Pre) and 10 (+BLB) axons were analysed, for volume quantification n = 8 axons (Pre) ,  
1149 n = 8 (+BLB) axons were analysed, from 3 independent cultures (two-tailed paired t-  
1150 test, \*\*\* $p$ <0.001). **(f)** DIV 14 hippocampal neurons were treated with blebbistatin (10  
1151  $\mu$ M, 60 min), then fixed and stained for endogenous F-actin (phalloidin) and  $\beta$ -III-  
1152 tubulin. Two-colour SIM was used to resolve the actomyosin and microtubule  
1153 structures, respectively. Bar = 1  $\mu$ m. Quantification of changes in the microtubule  
1154 intensity **(g)** and bundle width **(h)** in control and blebbistatin-treated one. Data represent  
1155 mean  $\pm$  s.e.m, for intensity quantification n=33 (Pre) and 34 (+BLB), for bundle width  
1156 quantification n = 33 axons (Pre), n = 37 axons (+BLB), from 3 independent cultures  
1157 (two-tailed paired t-test, n.s. no significant difference). **(i)** Hippocampal neurons  
1158 transfected with mito-TagRFP (red) and Lifeact-GFP (green) were imaged at the level  
1159 of their axons before and after blebbistatin treatment. Kymograph of mitochondria  
1160 movements from boxed regions are shown in lower panels. Asterisks indicate moving  
1161 mitochondria.  $\bar{x}$ =10  $\mu$ m,  $\bar{y}$ =10 s. **(j)** Quantification of average speed of  
1162 mitochondria transport in **(i)**. The frequency distribution of the trajectories with  
1163 different speed are shown to note the effect on docking (0 and 0.1  $\mu$ m/s) and moving  
1164 mitochondria. Data represent mean  $\pm$  s.e.m, n=7 (Pre) and 8 (+BLB) axons from 3  
1165 independent cultures (Student's t-test, \* $p$ <0.05). **(k)** Quantification of average speed of

1166 CTB-positive carriers with and without blebbistatin treatment, as shown in transport in  
1167 **(Fig. 7a)**. The frequency distribution of the trajectories with different speed are shown  
1168 to note the effect on slow and fast CTB-carriers, respectively. Data represent mean  $\pm$   
1169 s.e.m, n=3 (Pre) and 3 (+BLB) experiments from 3 independent preparations (Student's  
1170 t-test, \* $p < 0.05$ ).

1171

1172 ***Supplementary Movie 1. Retrograde trafficking of Lysotracker-labelled cargoes in***  
1173 ***the axon terminals.***

1174 The retrograde trafficking of axonal cargoes labelled with Lysotracker-deepRed in the  
1175 terminal chamber of the microfluidic device. From top to bottom: The Lysotracker  
1176 carriers overlapping with bright field signals and the masked carriers and trajectories  
1177 are shown in the top panels, with the boxed regions of interest being magnified in the  
1178 bottom panels. Bar = 5  $\mu\text{m}$ .

1179

1180 ***Supplementary Movie 2. Retrograde trafficking of CTB-labelled endosomes.***

1181 The retrograde trafficking flux of axonal cargoes labelled with CTB in an axon channel  
1182 of a microfluidic device. From top to bottom: the CTB-labelled cargoes, their  
1183 trajectories, and the trajectories that overlapped with the brightfield signals are shown,  
1184 respectively. Bar = 5  $\mu\text{m}$ .

1185

1186 ***Supplementary Movie 3. The transit of cargo causes a transient radial expansion of***  
1187 ***the axon.***

1188 The passage of cargoes-associated black-holes through the axon shafts caused an  
1189 obvious mechanical stretching of the shafts, which are visualized in the Lifeact-GFP-  
1190 expressing neuron (green) by time-lapse SIM. Black-holes that associated with moving

1191 cargoes are indicated with arrows. Bar = 2  $\mu\text{m}$ .

1192

1193 ***Supplementary Movie 4. Retrograde trafficking of CTB-labelled endosomes with***  
1194 ***short-term blebbistatin treatment.***

1195 The retrograde trafficking flux of axonal cargoes labelled with CTB in an axon channel  
1196 of a microfluidic device, after treatment with 10  $\mu\text{M}$  blebbistatin for 60 min. From top  
1197 to bottom: the CTB-labelled cargoes, their trajectories and the trajectories that  
1198 overlapped with the brightfield signals were shown, respectively. Bar = 5  $\mu\text{m}$ .

1199

1200 ***Supplementary Movie 5. Retrograde trafficking of LysoTracker-labelled endosomes***  
1201 ***after blebbistatin treatment.***

1202 The retrograde trafficking of axonal cargoes labelled with LysoTracker-deepRed in the  
1203 terminal chamber of a microfluidic device, after treated with 10  $\mu\text{M}$  blebbistatin for 60  
1204 min. From top to bottom: the LysoTracker carriers overlapping with bright field signals  
1205 and the masked carriers and trajectories are shown in the top panels, with the boxed  
1206 regions of interest being magnified in the bottom panels. Bar = 5  $\mu\text{m}$ .



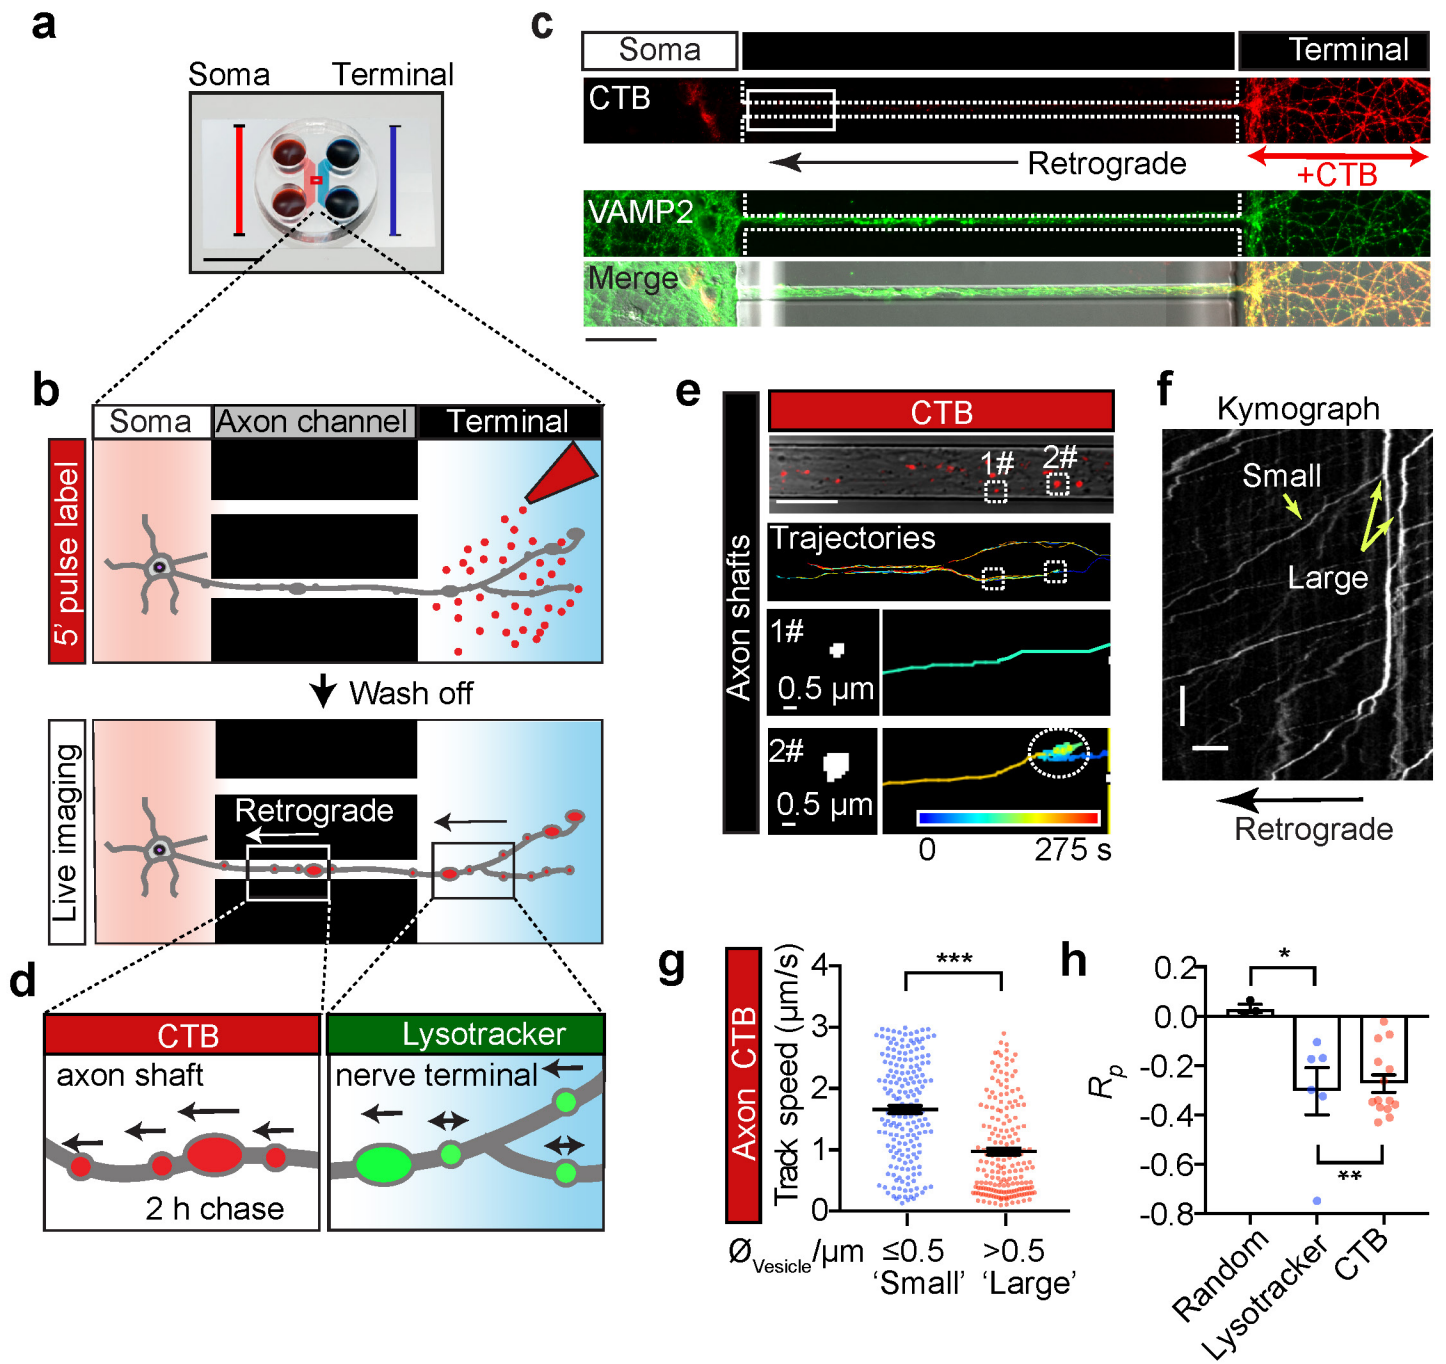

Figure 1. The speed of retrograde axonal transport cargoes is inversely correlated with their size.

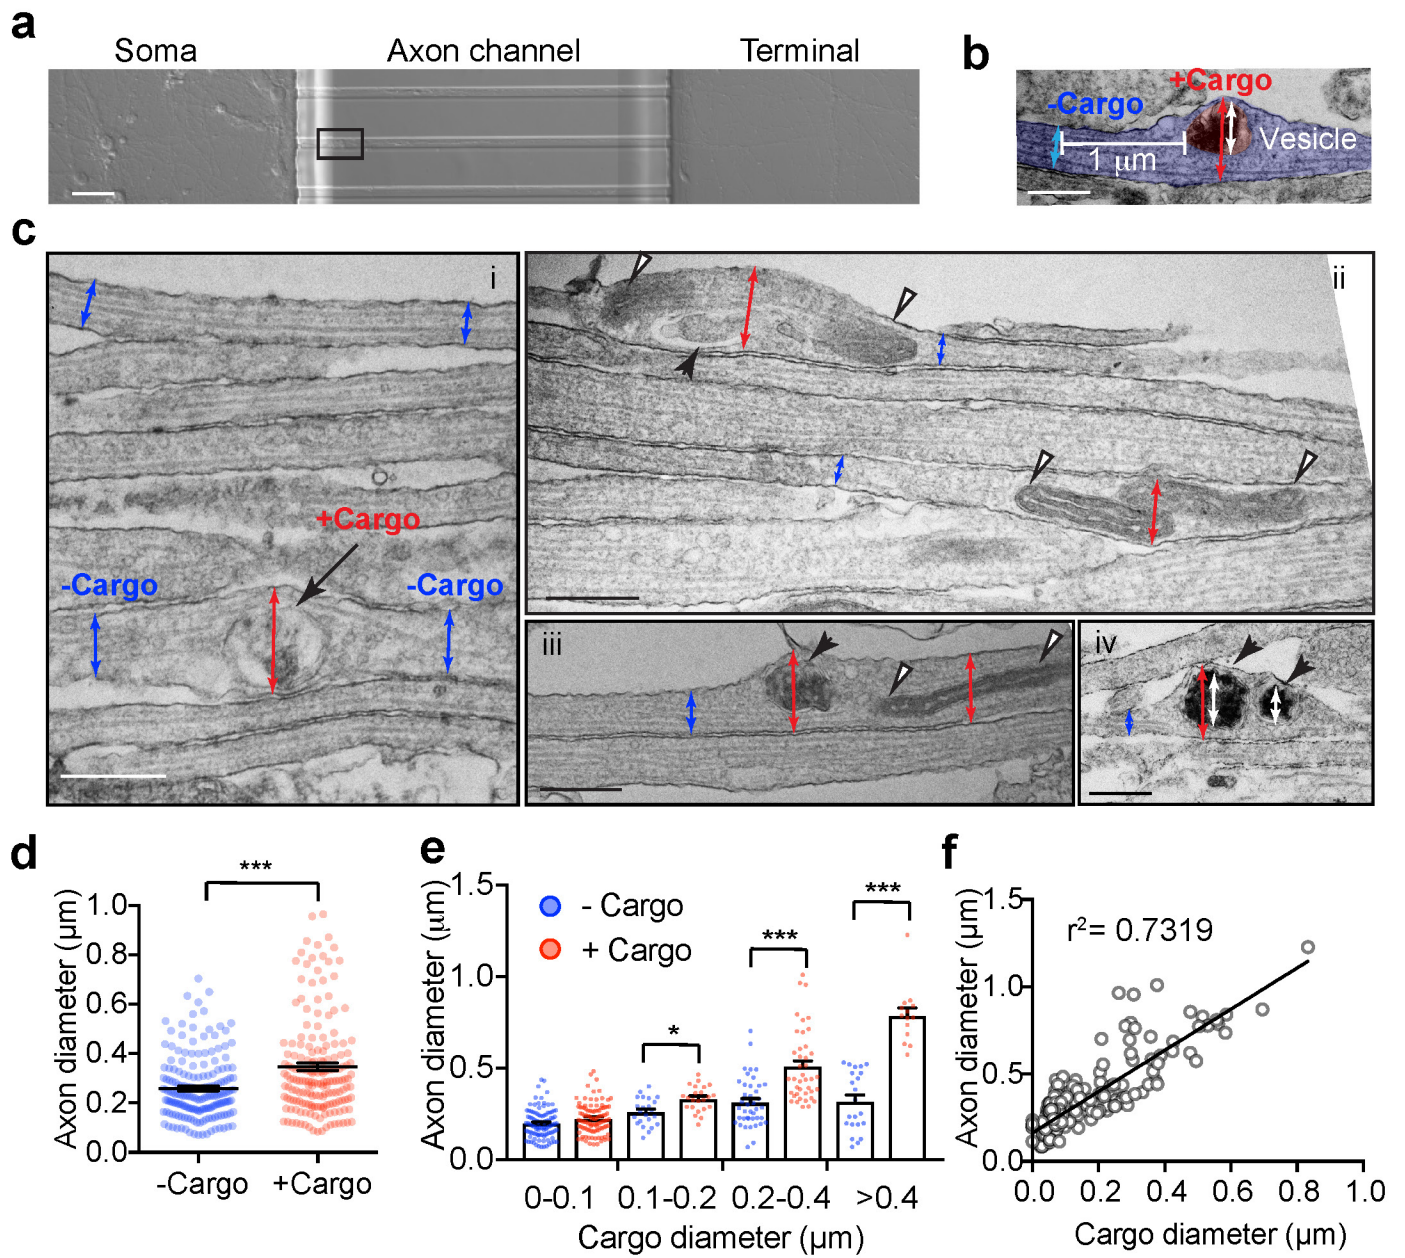

**Figure 2. The size of axonal cargoes correlates with the transient radial expansion of axon shafts.**

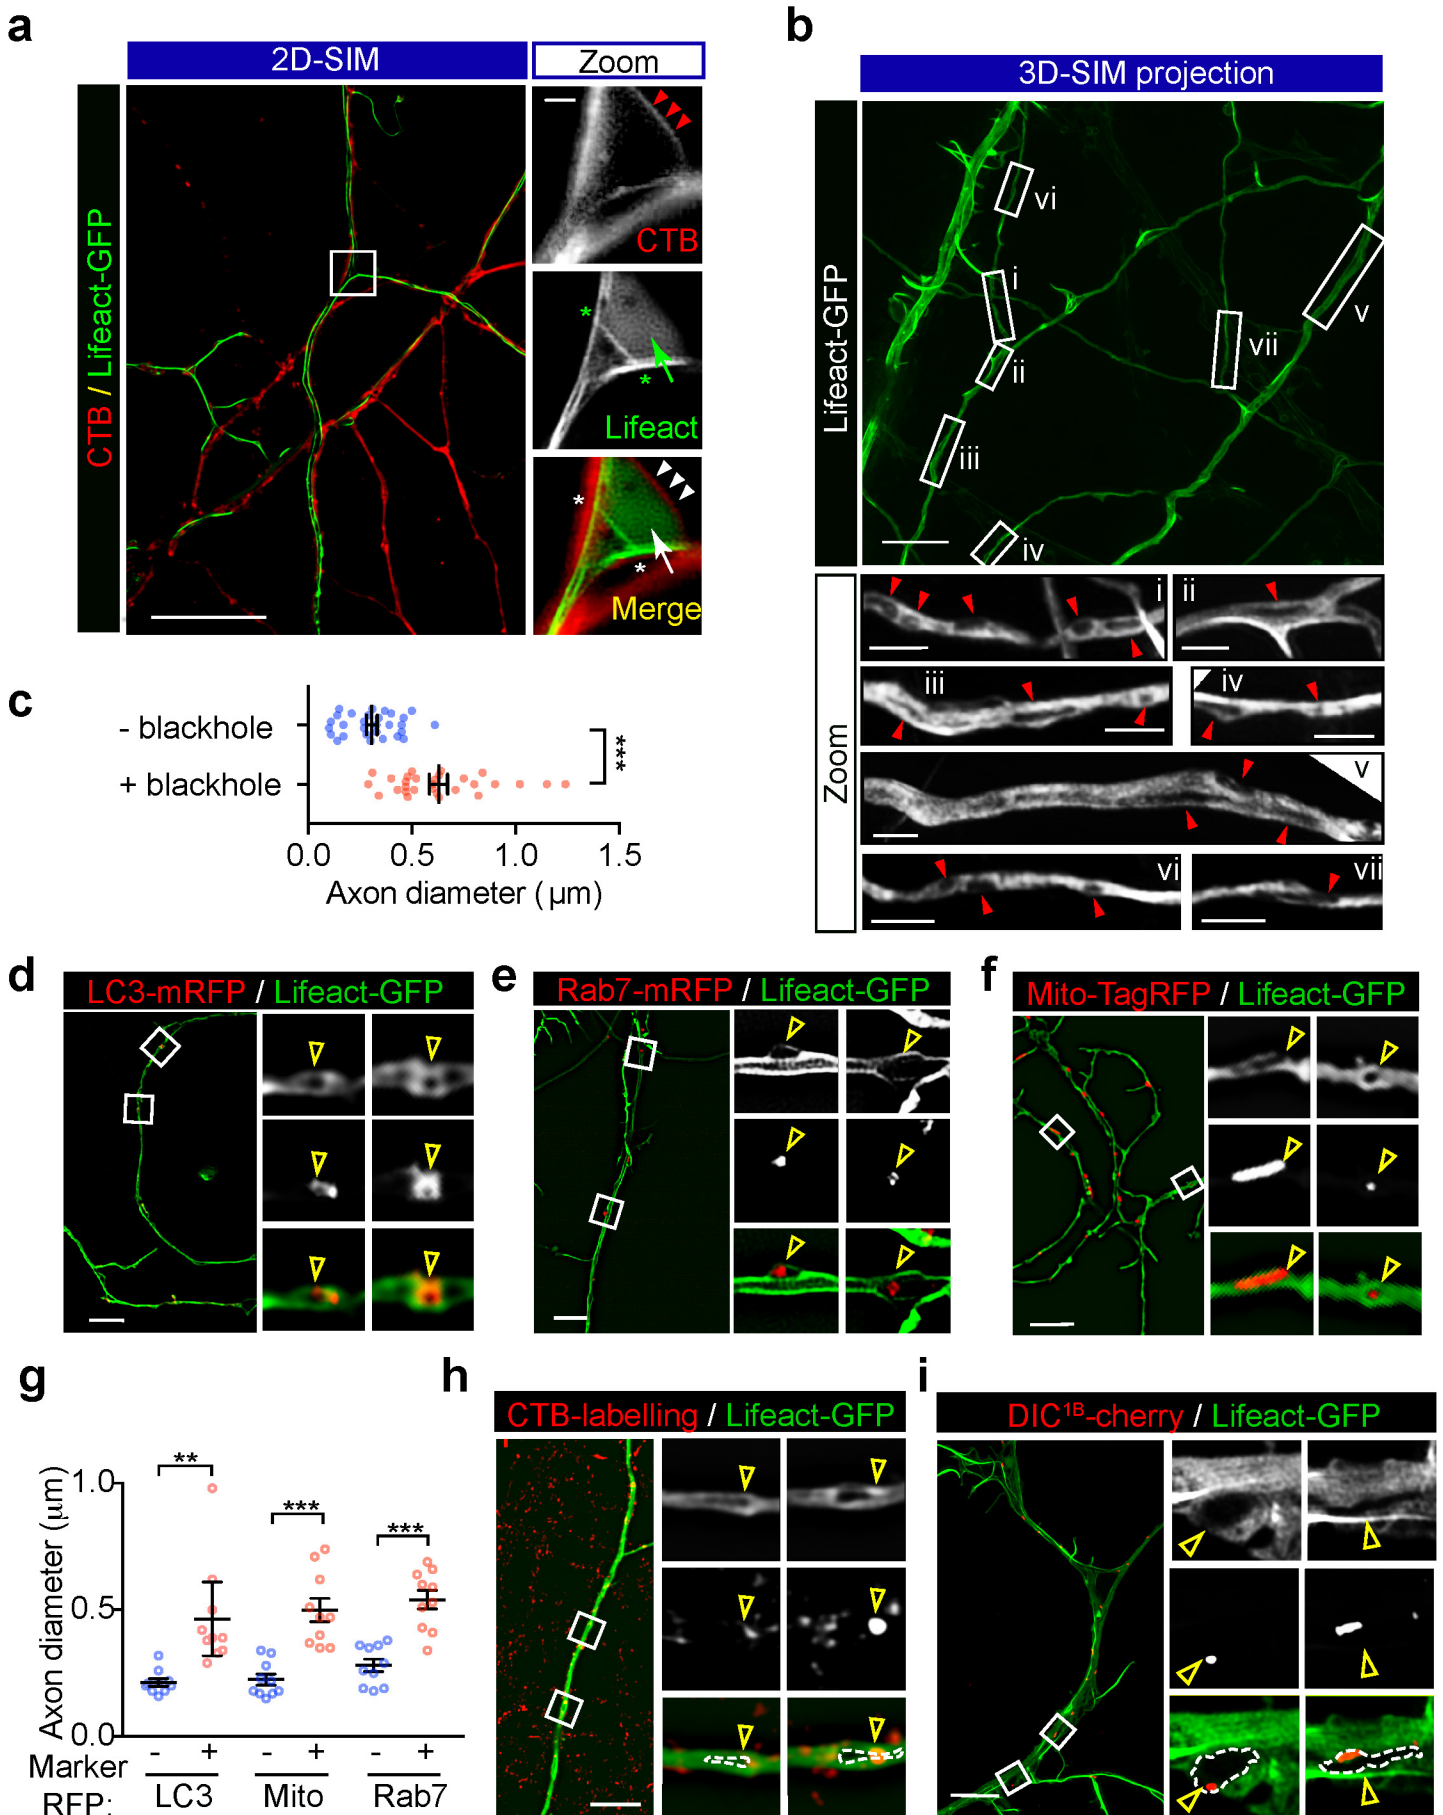

**Figure 3. Large retrograde cargoes produce “blackholes” within the axons of Lifact-GFP-expressing neurons.**



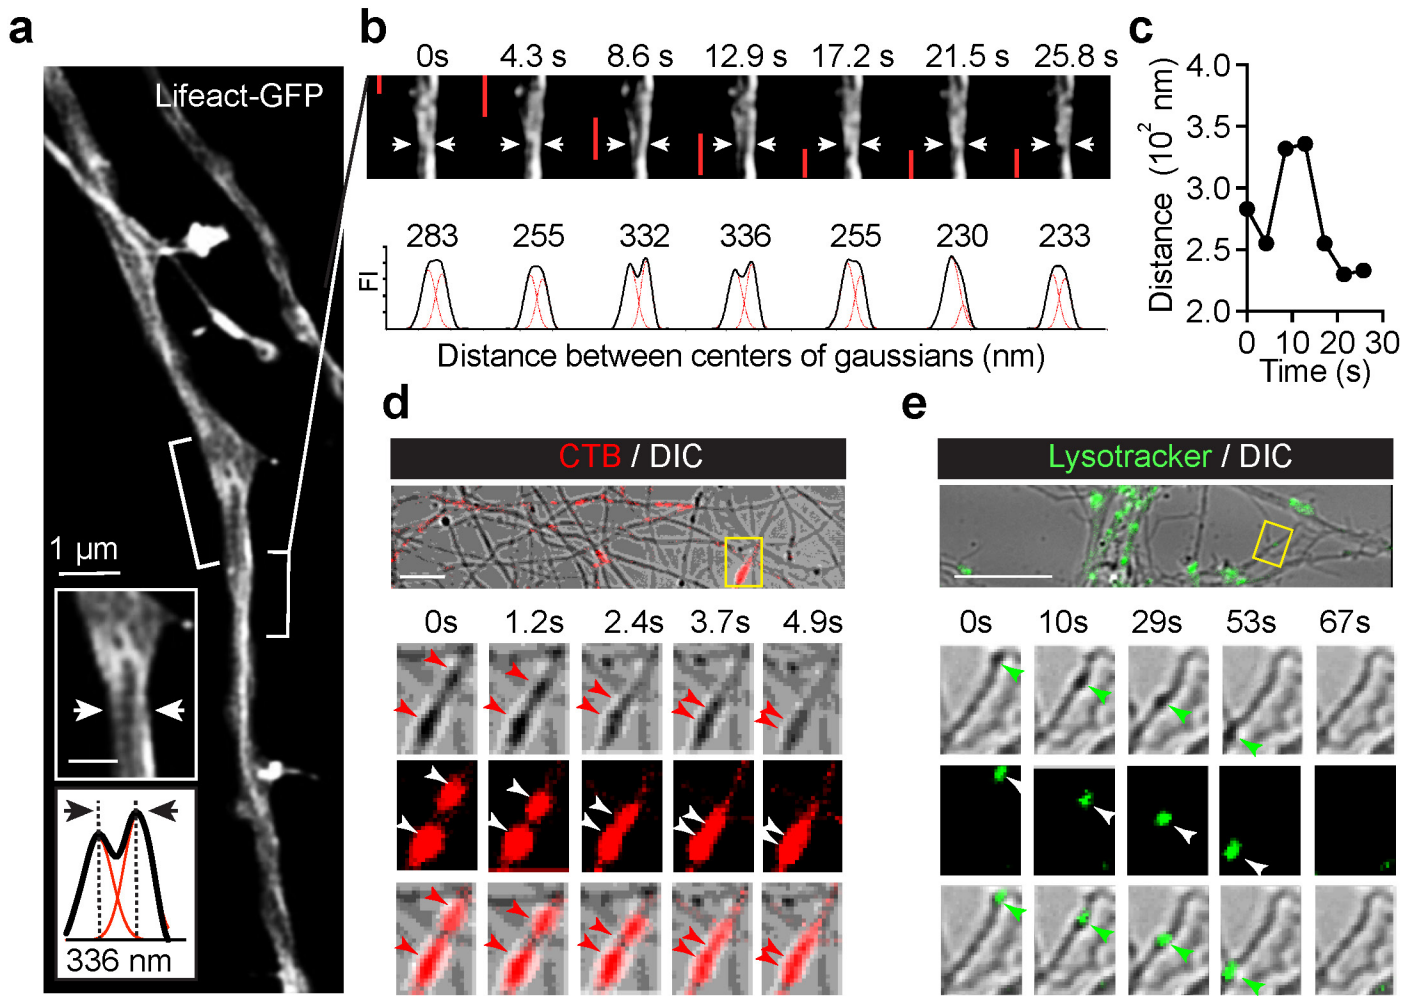

Figure 4. The transit of cargo causes a transient radial expansion of the axon.

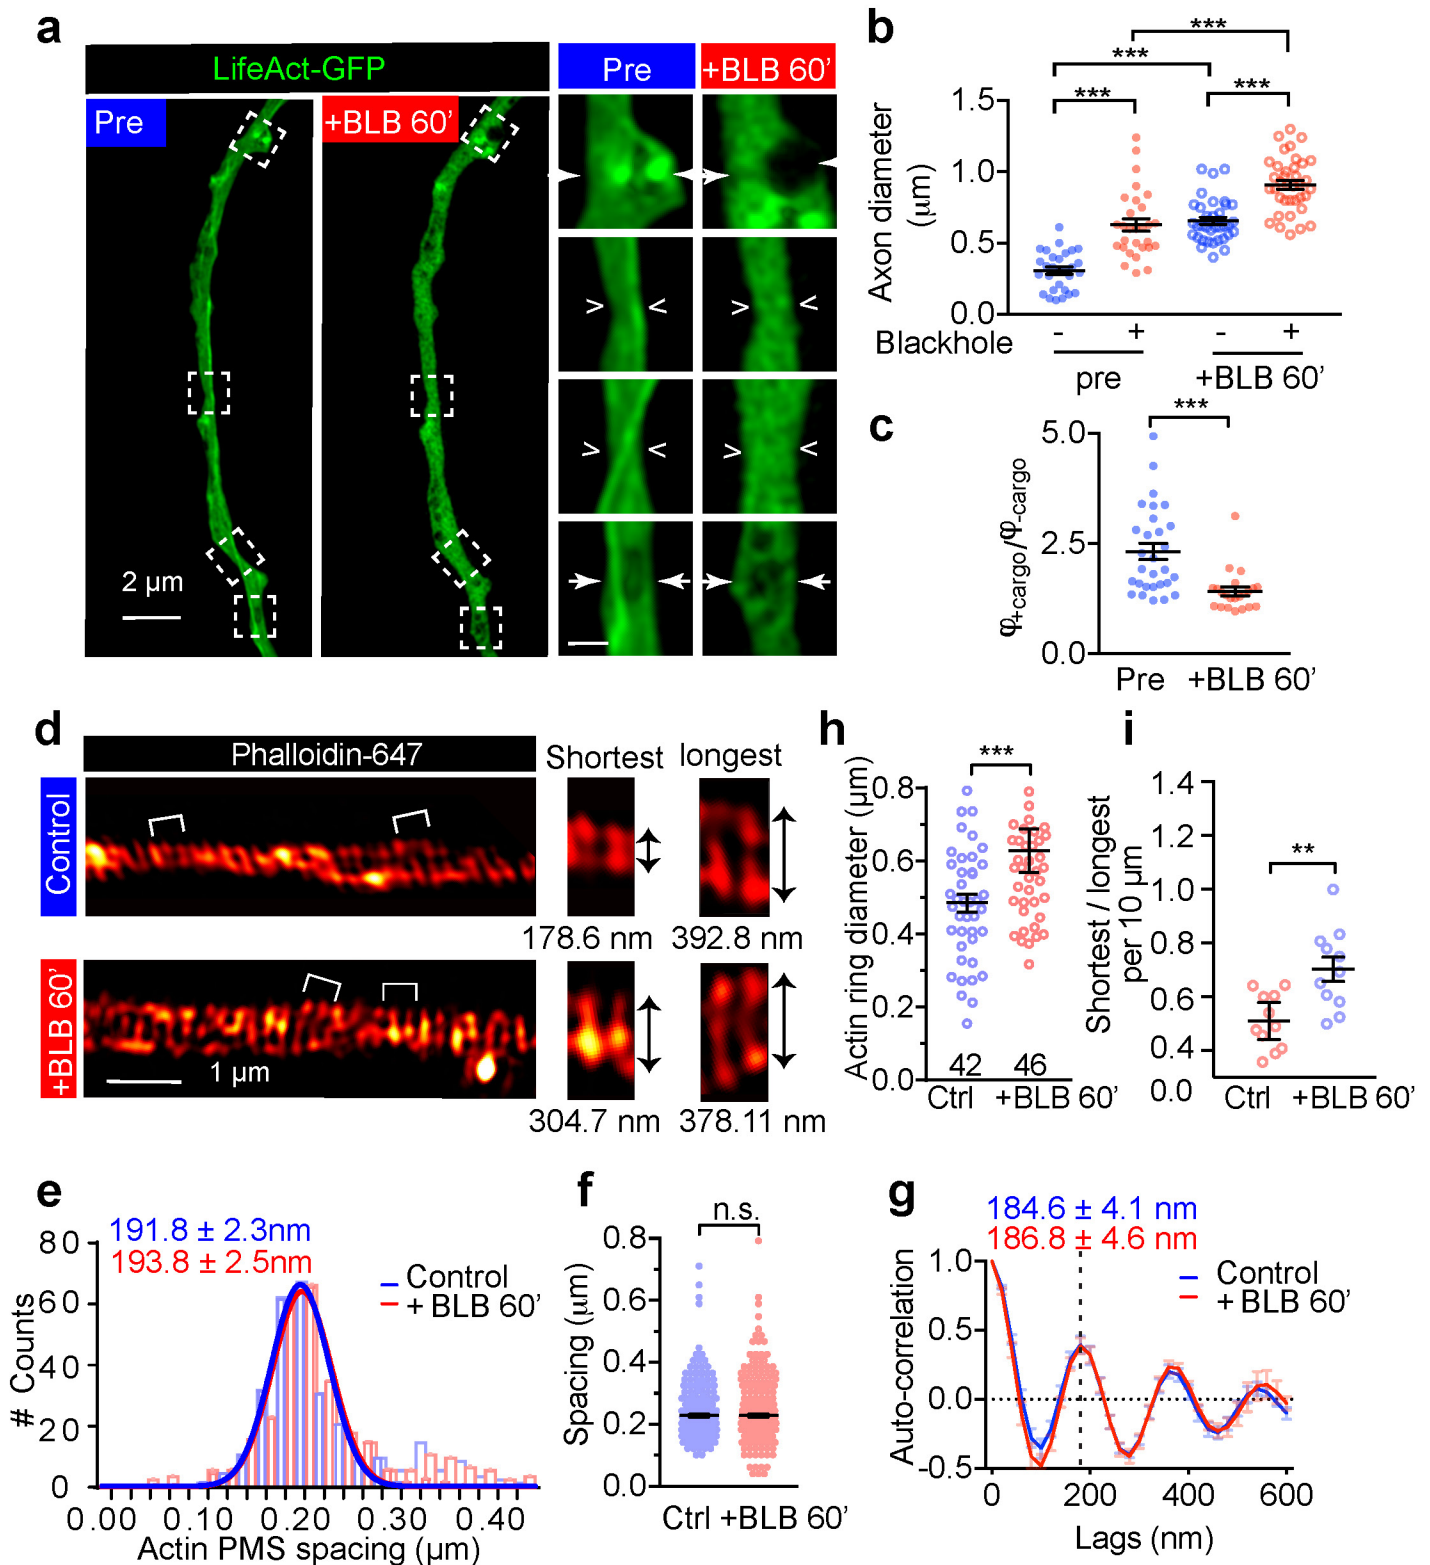

**Figure 5 Short-term inactivation of NM-II increases the axon diameter without affecting the actin ring periodicity.**

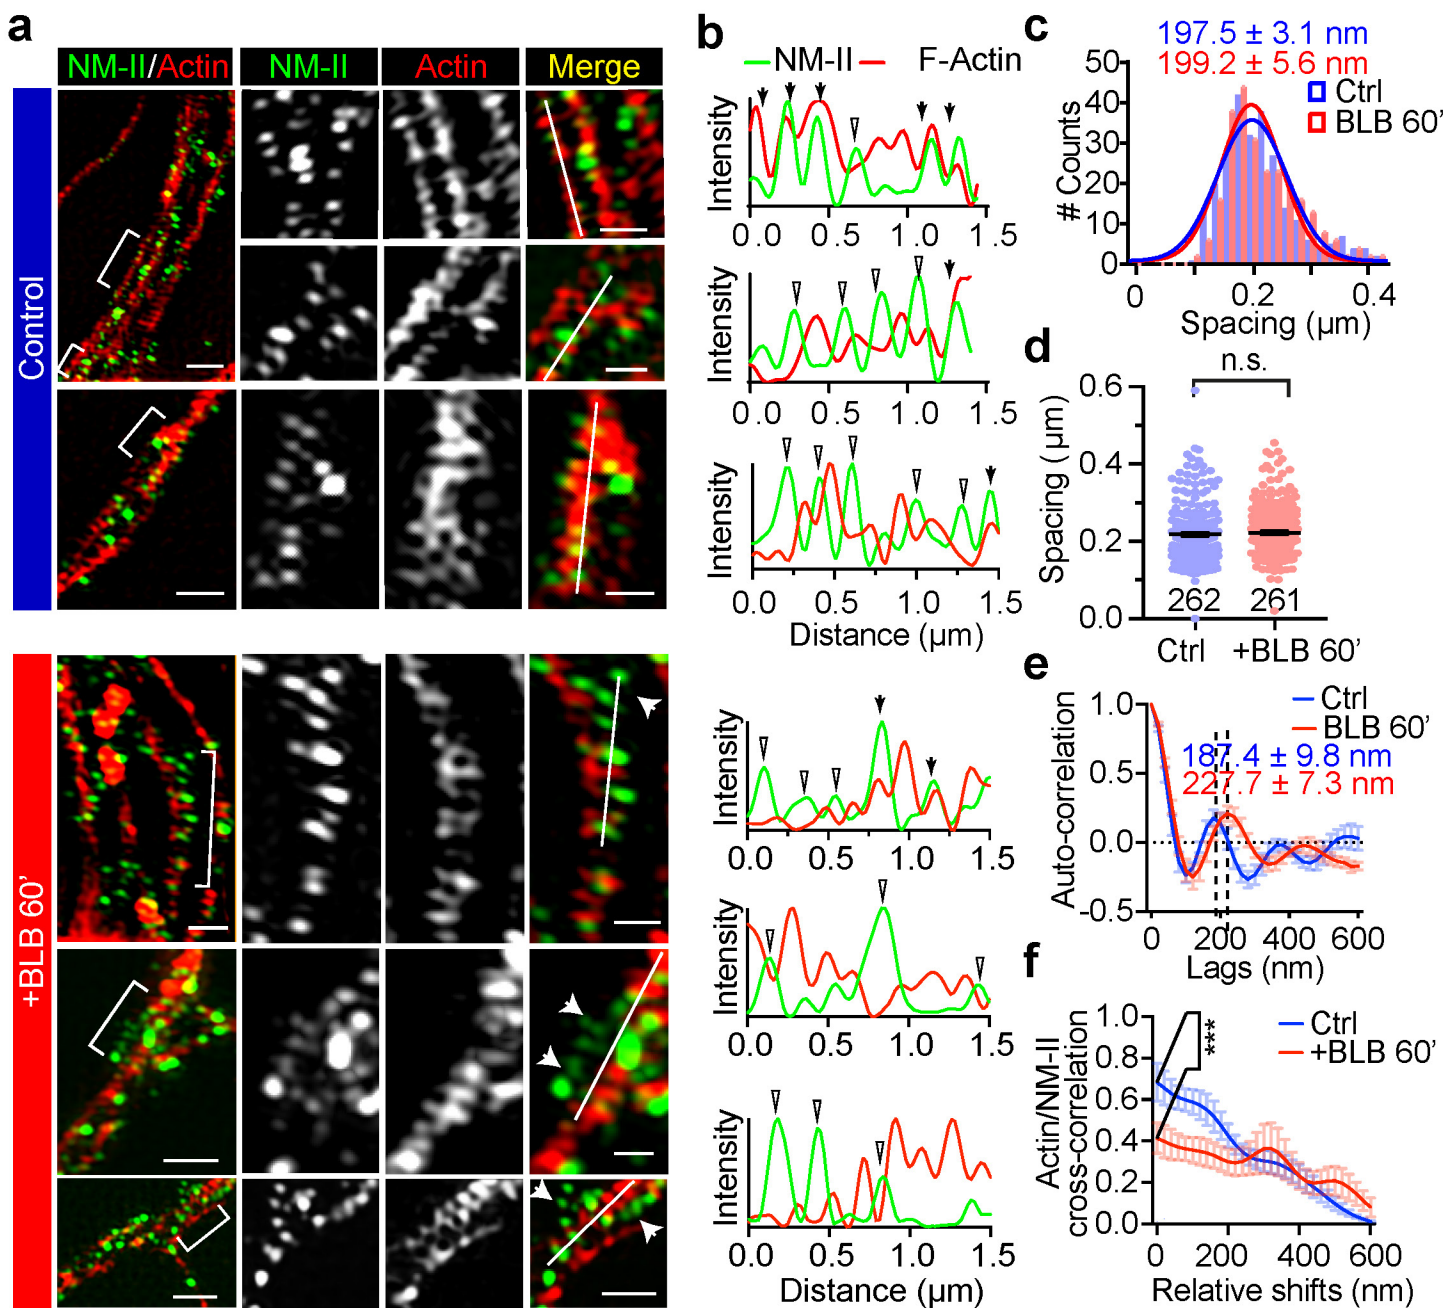

**Figure 6. NM-II immunostaining reveals a periodic pattern that correlates with the periodic actin rings along the axons.**

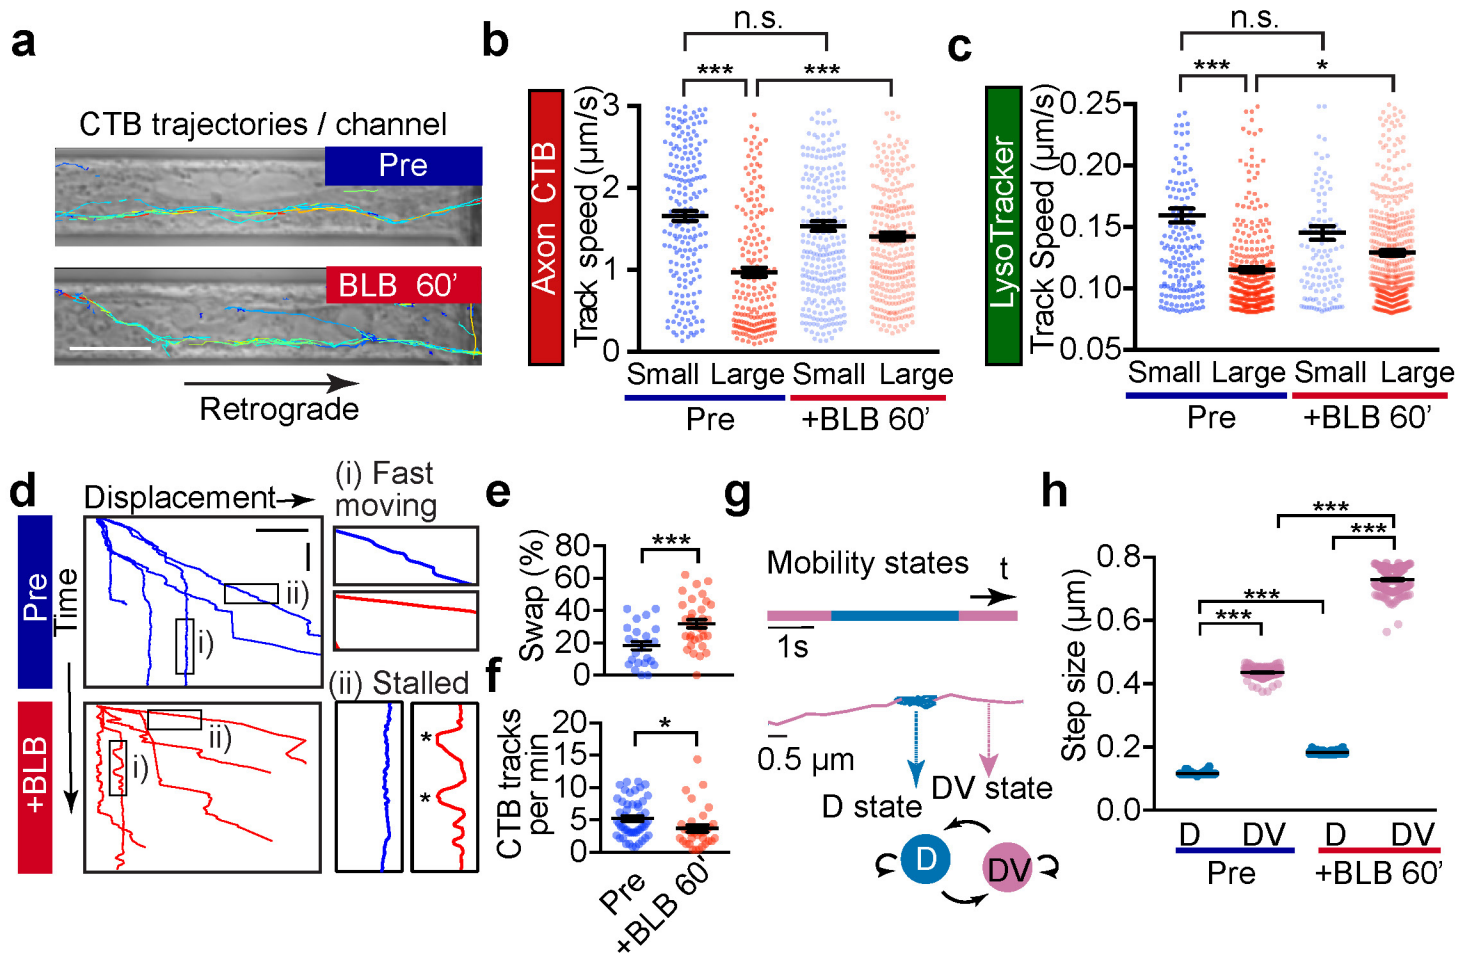

**Figure 7. Short-term inactivation of actomyosin-II reduces the retrograde transport efficiency.**



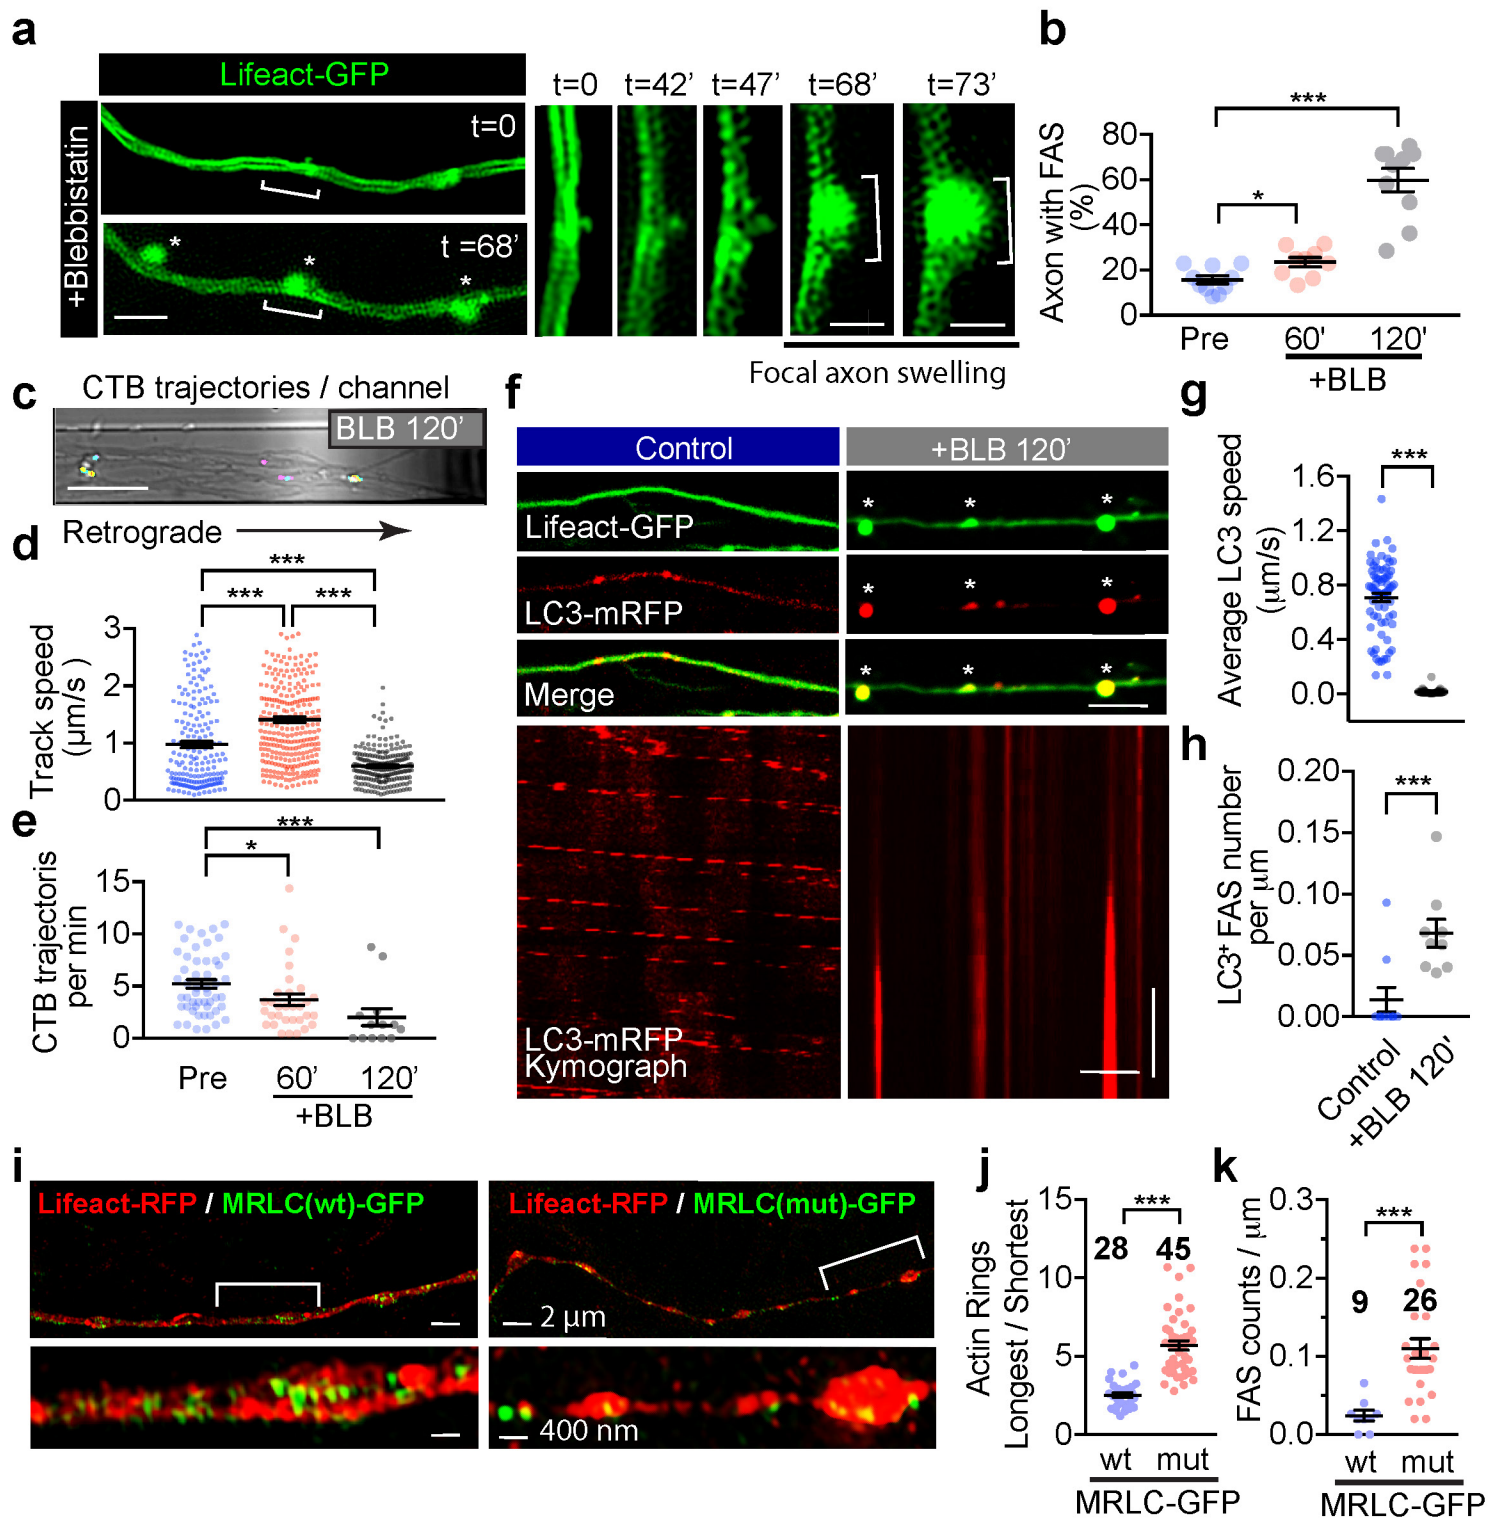

**Figure 8. Long-term inhibition of actomyosin-II activity triggers accumulation of stalled cargo in focal axonal swellings (FAS).**



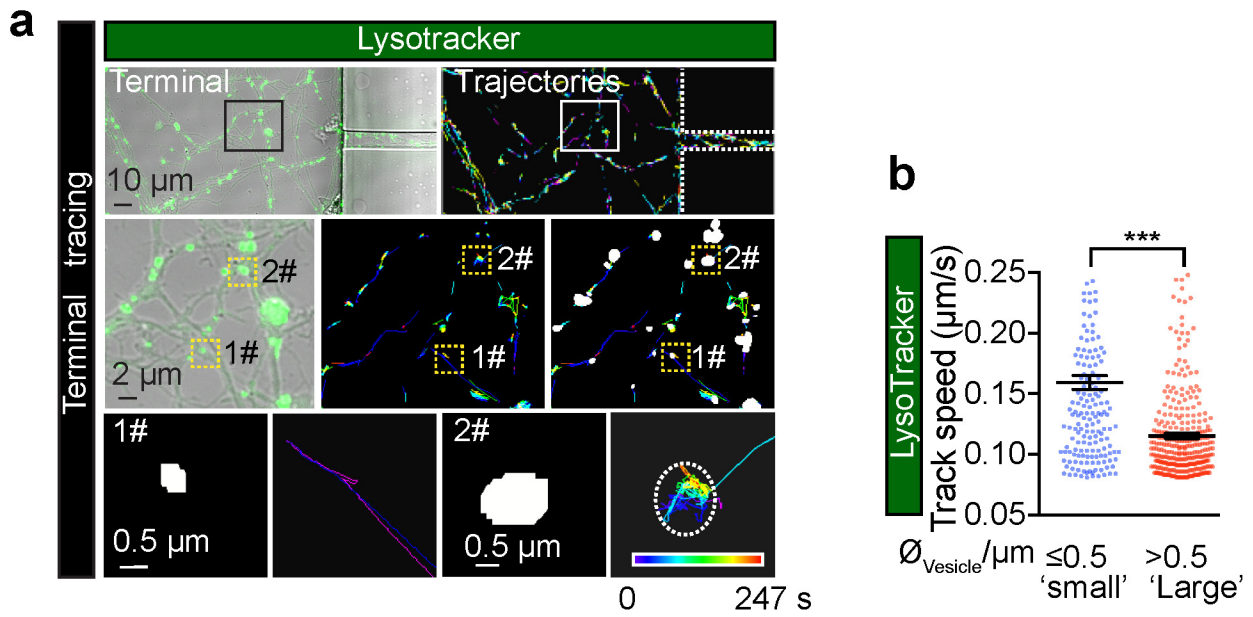

**Supplementary Figure 1. The speed of LysoTracker-positive cargoes is inversely correlated with their size.**

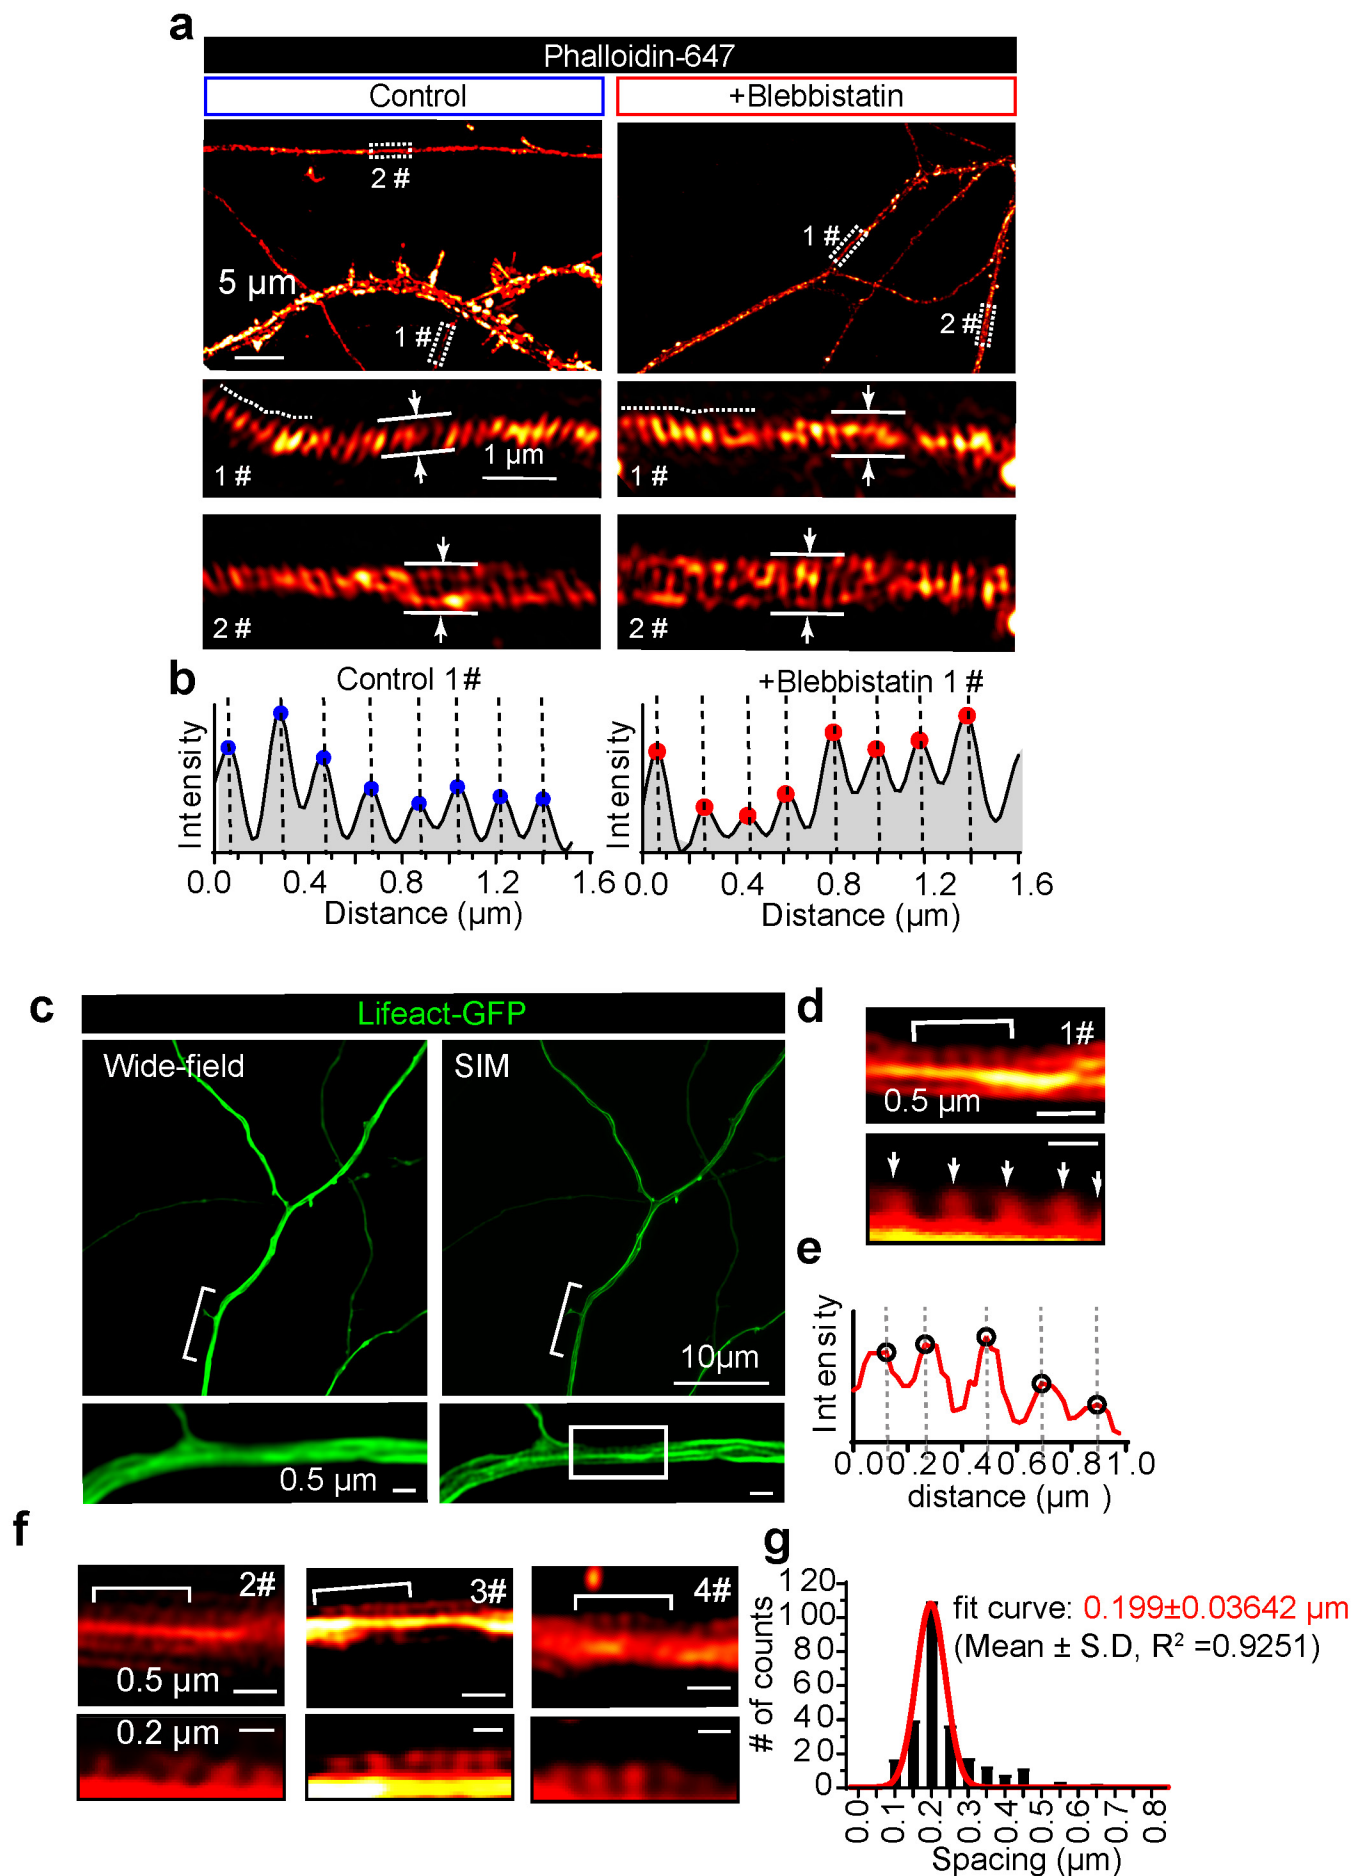

Supplementary Figure 2. Periodic distribution of F-actin rings along the axon of hippocampal neurons.

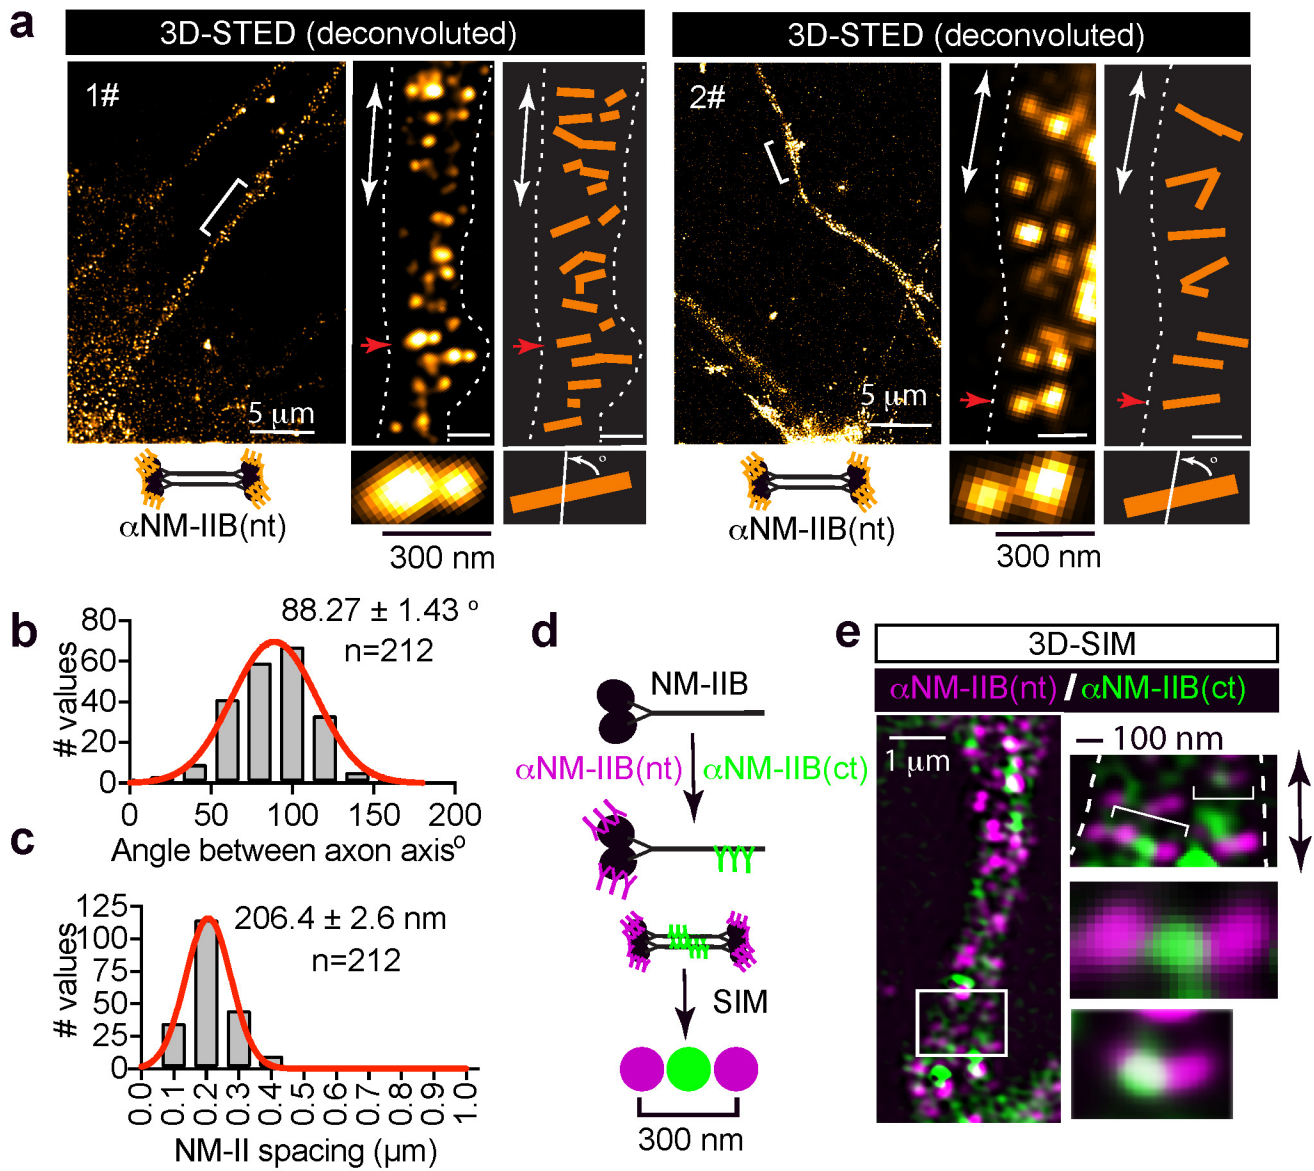

**Supplementary Figure 3. Periodic NM-II filaments are perpendicular to the longitudinal axis of the axon.**

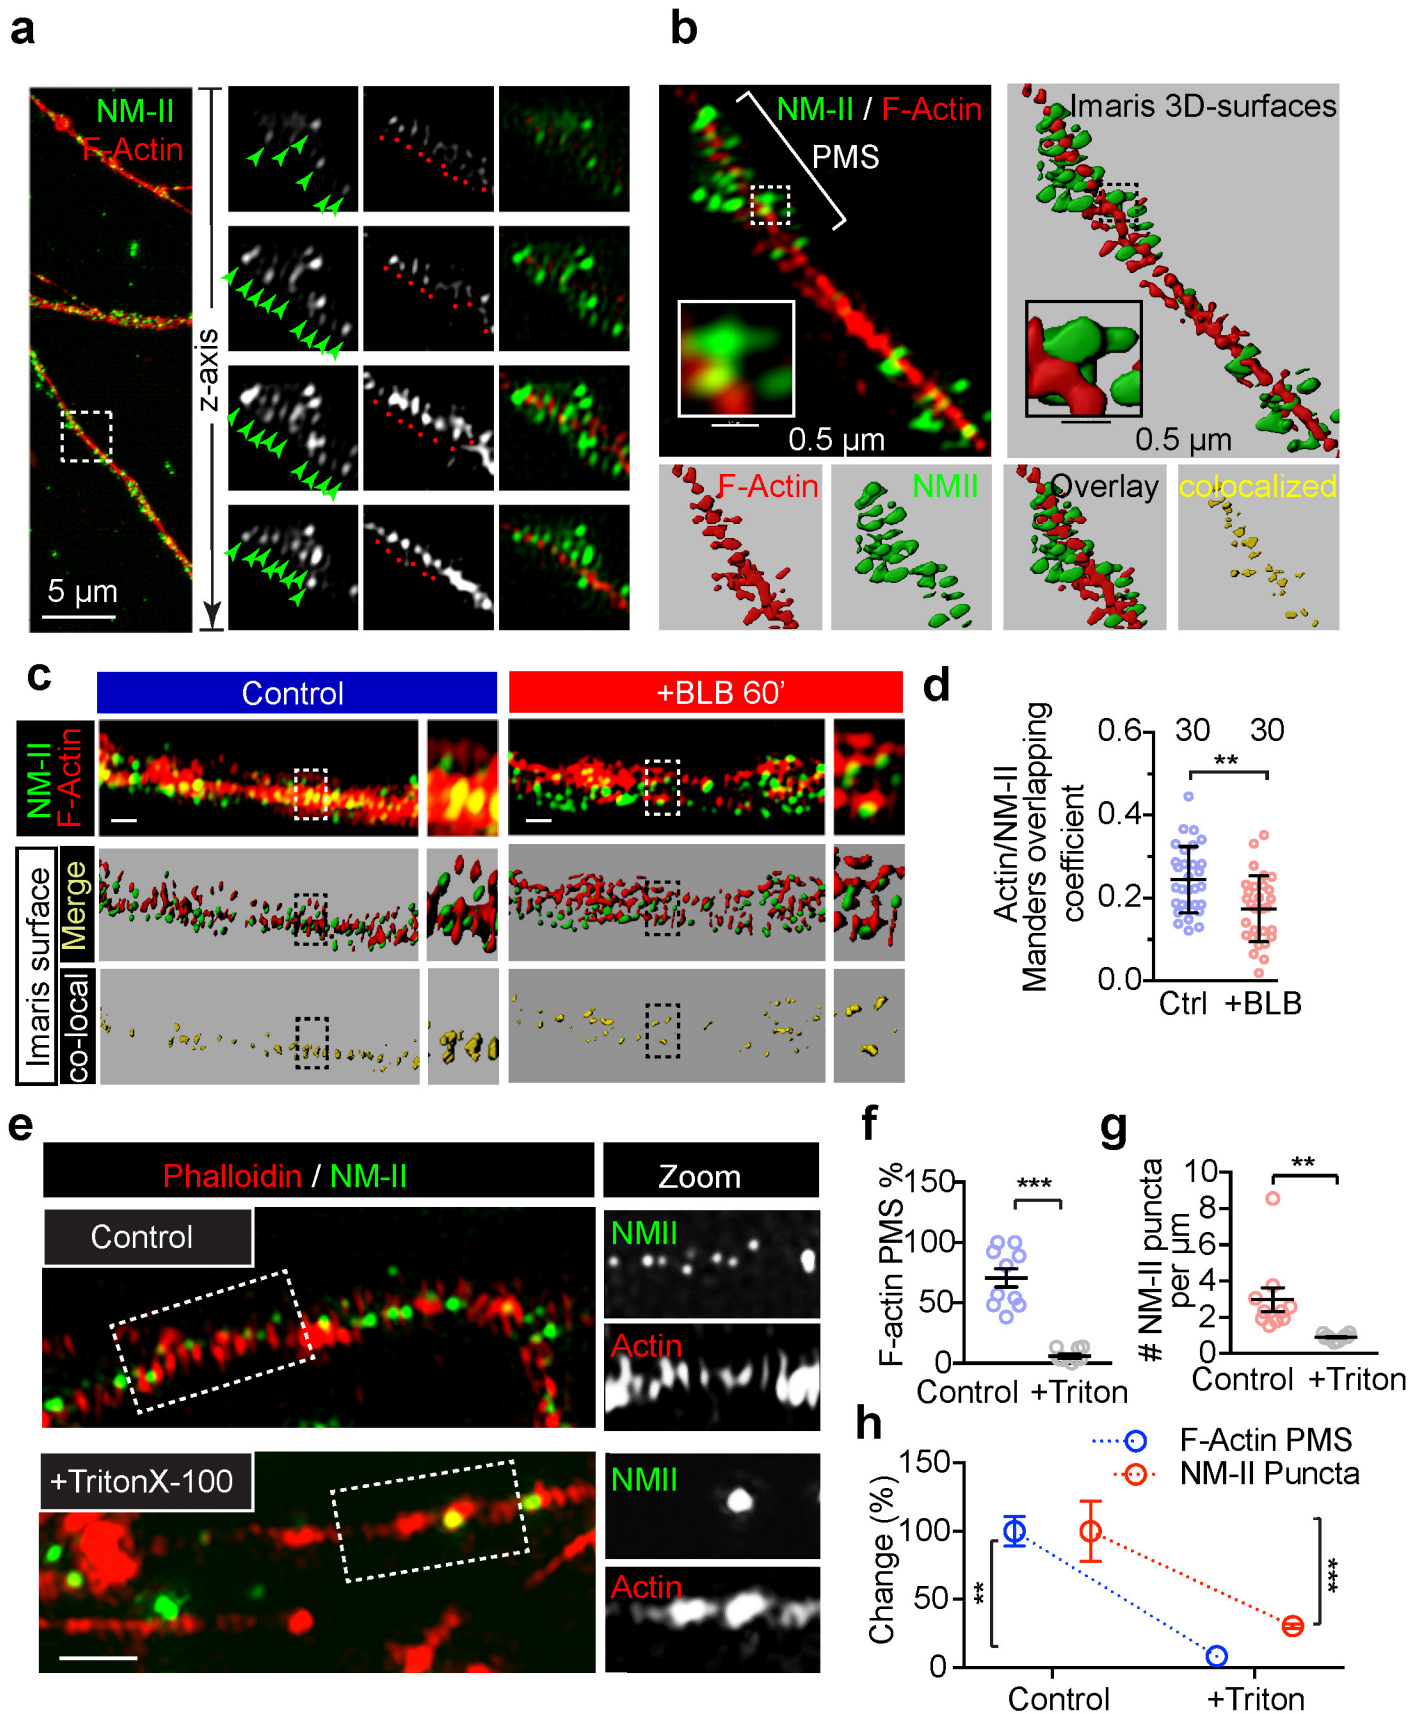

**Supplementary Figure 4. NM-II immunostaining reveals a periodic pattern that correlates with the periodic actin rings along the axon.**



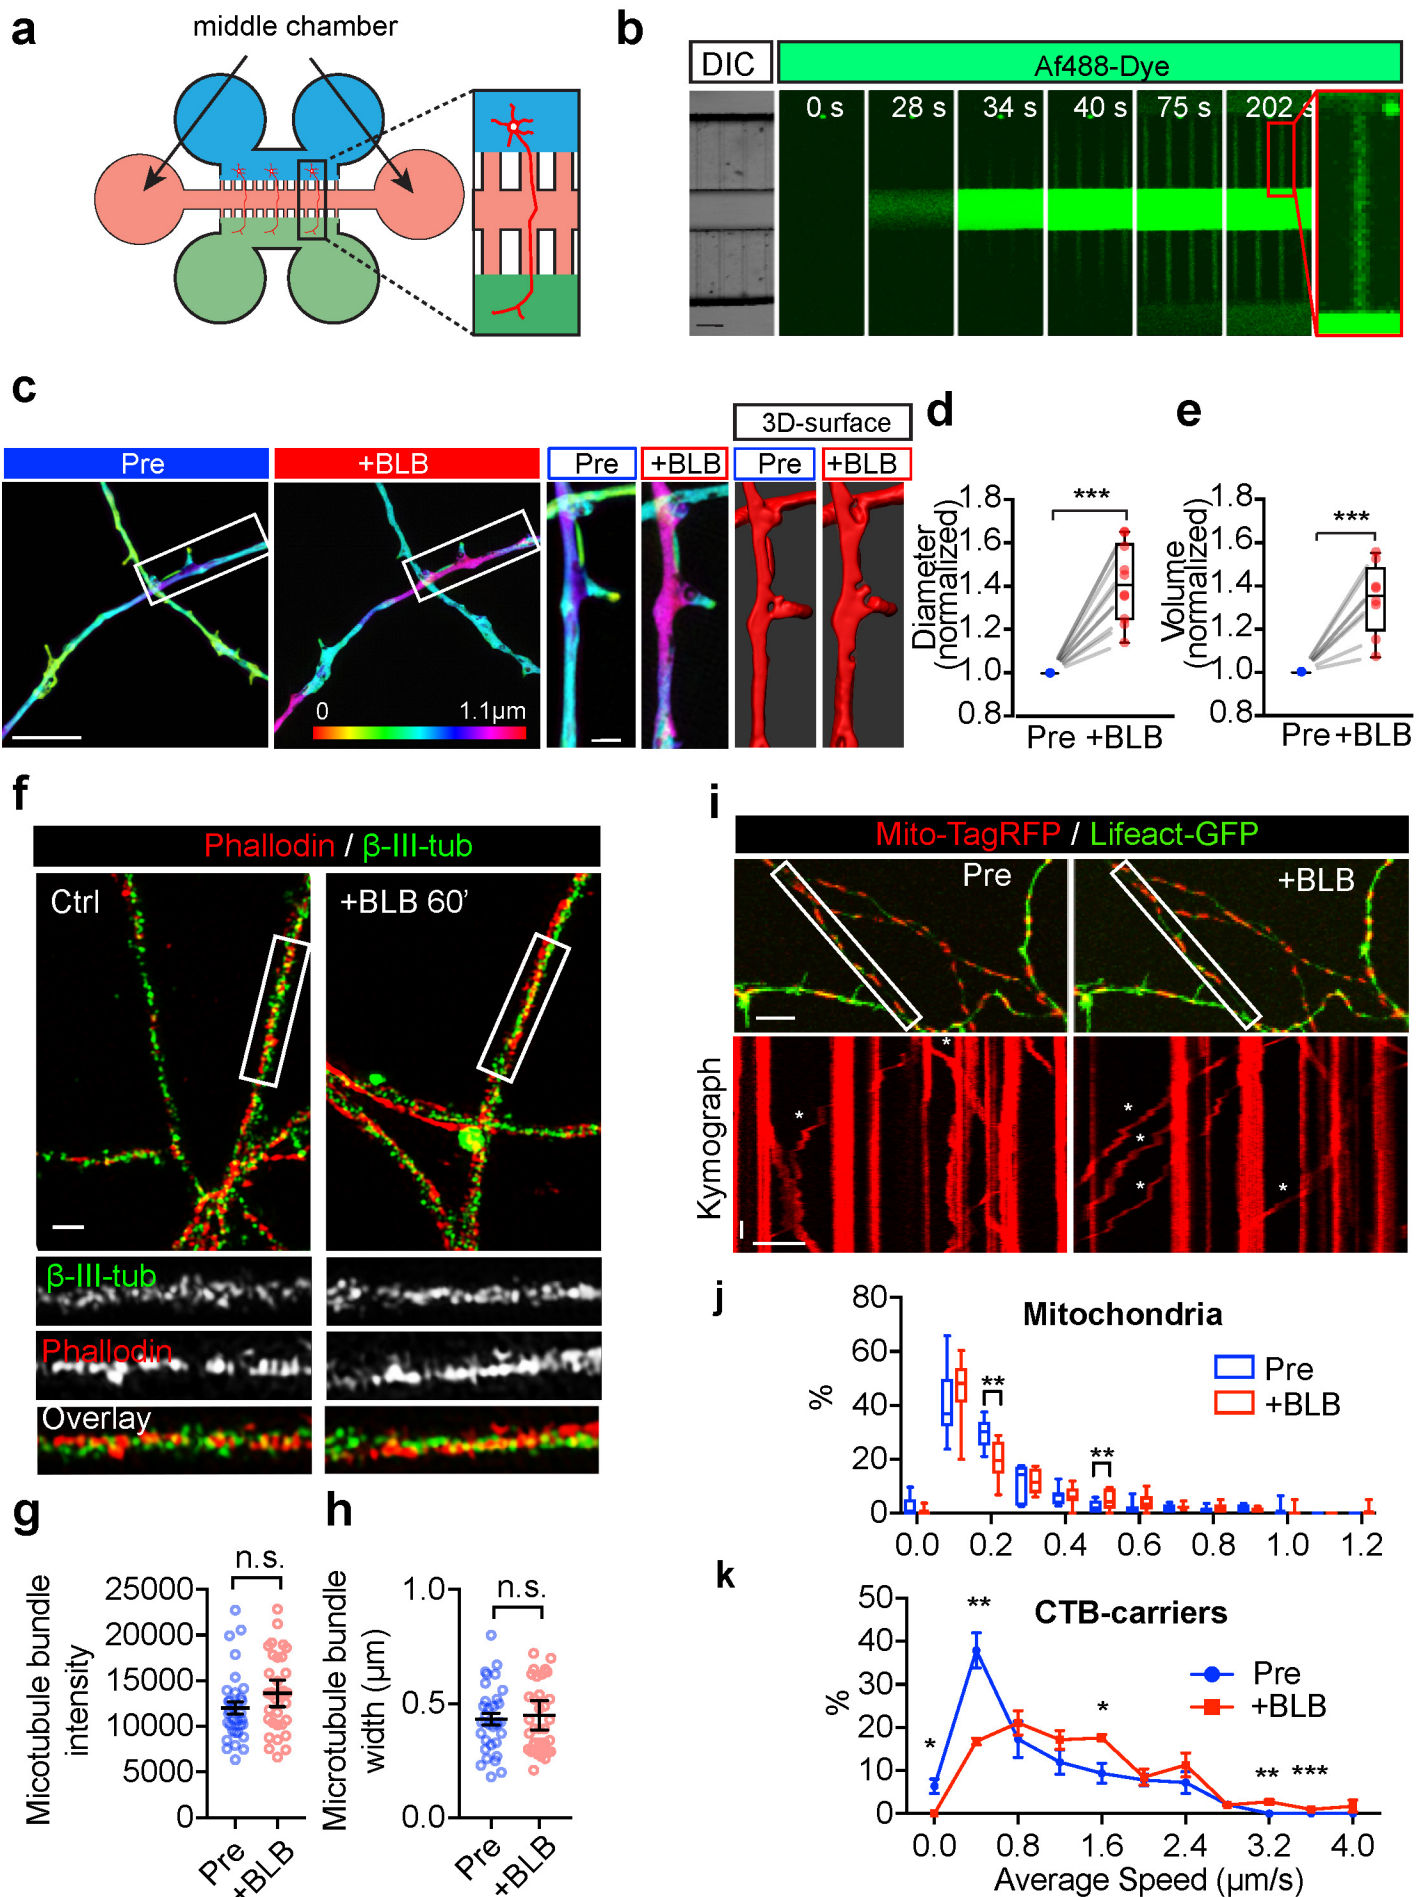

Source: https://www.biorxiv.org/content/10.1101/492959v2.full.pdf
